# 1 Evolution and global transmission of a multidrug-resistant, community- 2 associated MRSA lineage from the Indian subcontinent

3  
4 Eike J. Steinig<sup>1,2</sup>, Sebastian Duchene<sup>3</sup>, D. Ashley Robinson<sup>4</sup>, Stefan Monecke<sup>5,6,7</sup>, Maho Yokoyama<sup>8</sup>, Maisem  
5 Laabei<sup>8</sup>, Peter Slickers<sup>5,6</sup>, Patiyan Andersson<sup>1</sup>, Deborah Williamson<sup>9</sup>, Angela Kearns<sup>10</sup>, Richard Goering<sup>11</sup>,  
6 Elizabeth Dickson<sup>12</sup>, Ralf Ehricht<sup>5,7</sup>, Margaret Ip<sup>13</sup>, Mathew V.N. O'Sullivan<sup>14</sup>, Geoffrey W. Coombs<sup>15</sup>,  
7 Andreas Petersen<sup>16</sup>, Grainne Brennan<sup>17</sup>, Anna C Shore<sup>18</sup>, David C. Coleman<sup>18</sup>, Annalisa Pantosti<sup>19</sup>, Herminia  
8 de Lencastre<sup>20,21</sup>, Henrik Westh<sup>22,23</sup>, Nobumichi Kobayashi<sup>24</sup>, Helen Heffernan<sup>25</sup>, Birgit Strommenger<sup>26</sup>,  
9 Franziska Layer<sup>26</sup>, Stefan Weber<sup>27</sup>, Hege Aamot<sup>28</sup>, Leila Skakni<sup>29</sup>, Sharon J. Peacock<sup>30</sup>, Derek Sarovich<sup>1,31</sup>,  
10 Simon Harris<sup>32</sup>, Julian Parkhill<sup>32</sup>, Ruth C. Massey<sup>33</sup>, Mathew T.G. Holden<sup>32,34</sup>, Stephen D. Bentley<sup>32</sup>, and  
11 Steven Y.C. Tong<sup>1,35</sup>

12  
13 <sup>1</sup>Menzies School of Health Research, Darwin, Australia, <sup>2</sup>Australian Institute of Tropical Health and Medicine,  
14 Townsville, Australia, <sup>3</sup>Department of Biochemistry & Molecular Biology, University of Melbourne, Melbourne,  
15 Australia, <sup>4</sup>University of Mississippi Medical Center, Jackson, United States, <sup>5</sup>Abbott (Alere Technologies GmbH),  
16 Jena, Germany, <sup>6</sup>InfectoGnostics Research Campus, Jena, Germany, <sup>7</sup>Technical University of Dresden, Dresden,  
17 Germany, <sup>8</sup>Milner Centre for Evolution, University of Bath, Bath, United Kingdom, <sup>9</sup>Doherty Applied Microbial  
18 Genomics, Department of Microbiology & Immunology, The University of Melbourne at The Peter Doherty Institute  
19 for Infection and Immunity, Melbourne, Australia; Microbiological Diagnostic Unit Public Health Laboratory,  
20 Department of Microbiology & Immunology, The University of Melbourne at The Peter Doherty Institute for  
21 Infection and Immunity, Melbourne, Australia, <sup>10</sup>Public Health England, National Infection Service, London, United  
22 Kingdom, <sup>11</sup>Creighton University, Omaha, United States, <sup>12</sup>Scottish Microbiology Reference Laboratories,  
23 Glasgow, United Kingdom, <sup>13</sup>The Chinese University of Hong Kong, Hong Kong, <sup>14</sup>The University of Sydney,  
24 Sydney, Australia, <sup>15</sup>School of Veterinary and Laboratory Sciences, Murdoch University, Murdoch, Western  
25 Australia, <sup>16</sup>Statens Serum Institut, Copenhagen, Denmark, <sup>17</sup>National MRSA Reference Laboratory, St. James's  
26 Hospital, Dublin, Ireland, <sup>18</sup>Microbiology Research Unit, School of Dental Science, University of Dublin, Trinity  
27 College Dublin, Ireland, <sup>19</sup>Istituto Superiore di Sanità, Rome, Italy, <sup>20</sup>Instituto de Tecnologia Química e Biológica,  
28 Oeiras, Portugal, <sup>21</sup>The Rockefeller University, New York City, United States of America, <sup>22</sup>University of  
29 Copenhagen, Copenhagen, Denmark, <sup>23</sup>Hvidovre University Hospital, Hvidovre, Denmark, <sup>24</sup>Sapporo Medical  
30 University, Sapporo, Japan, <sup>25</sup>Institute of Environmental Science and Research, Wellington, New Zealand, <sup>26</sup>Robert  
31 Koch Institute, Wernigerode, Germany, <sup>27</sup>Sheikh Khalifa Medical City, Abu Dhabi, United Arab Emirates,  
32 <sup>28</sup>Akershus University Hospital, Lørenskog, Norway, <sup>29</sup>King Fahd Medical City, Riyadh, Kingdom of Saudi Arabia,  
33 <sup>30</sup>London School of Hygiene and Tropical Medicine, United Kingdom, <sup>31</sup>Sunshine Coast University, Sippy Downs,  
34 Australia, <sup>32</sup>Wellcome Trust Sanger Institute, Cambridge, United Kingdom, <sup>33</sup>School of Cellular and Molecular  
35 Medicine, University of Bristol, United Kingdom, <sup>34</sup>University of St Andrews, St Andrews, United Kingdom,  
36 <sup>35</sup>Victorian Infectious Disease Service, The Royal Melbourne Hospital, and The University of Melbourne, at the  
37 Peter Doherty Institute for Infection and Immunity, Melbourne, Australia

38  
39 Steven Y.C. Tong - [steven.tong@mh.org.au](mailto:steven.tong@mh.org.au)

## 40 **Abstract**

41

42 The evolution and global transmission of antimicrobial resistance has been well documented in Gram-  
43 negative bacteria and healthcare-associated epidemic pathogens, often emerging from regions with  
44 heavy antimicrobial use. However, the degree to which similar processes occur with Gram-positive  
45 bacteria in the community setting is less well understood. Here, we trace the recent origins and global  
46 spread of a multidrug resistant, community-associated *Staphylococcus aureus* lineage from the Indian  
47 subcontinent, the Bengal Bay clone (ST772). We generated whole genome sequence data of 340  
48 isolates from 14 countries, including the first isolates from Bangladesh and India, to reconstruct the  
49 evolutionary history and genomic epidemiology of the lineage. Our data shows that the clone emerged  
50 on the Indian subcontinent in the early 1970s and disseminated rapidly in the 1990s. Short-term  
51 outbreaks in community and healthcare settings occurred following intercontinental transmission,  
52 typically associated with travel and family contacts on the subcontinent, but ongoing endemic  
53 transmission was uncommon. Acquisition of a multidrug resistance integrated plasmid was  
54 instrumental in the divergence of a single dominant and globally disseminated clade in the early  
55 1990s. Phenotypic data on biofilm, growth and toxicity point to antimicrobial resistance as the driving  
56 force in the evolution of ST772. The Bengal Bay clone therefore combines the multidrug resistance  
57 of traditional healthcare-associated clones with the epidemiological transmission of community-  
58 associated MRSA. Our study demonstrates the importance of whole genome sequencing for tracking  
59 the evolution of emerging and resistant pathogens. It provides a critical framework for ongoing  
60 surveillance of the clone on the Indian subcontinent and elsewhere.

61

## 62 **Importance**

63

64 The Bengal Bay clone (ST772) is a community-acquired and multidrug-resistant *Staphylococcus*  
65 *aureus* lineage first isolated from Bangladesh and India in 2004. In this study, we show that the  
66 Bengal Bay clone emerged from a virulent progenitor circulating on the Indian subcontinent. Its  
67 subsequent global transmission was associated with travel or family contact in the region. ST772  
68 progressively acquired specific resistance elements at limited cost to its fitness and continues to be  
69 exported globally resulting in small-scale community and healthcare outbreaks. The Bengal Bay  
70 clone therefore combines the virulence potential and epidemiology of community-associated clones  
71 with the multidrug-resistance of healthcare-associated *S. aureus* lineages. This study demonstrates  
72 the importance of whole genome sequencing for the surveillance of highly antibiotic resistant  
73 pathogens, which may emerge in the community setting of regions with poor antibiotic stewardship  
74 and rapidly spread into hospitals and communities across the world.

## 75 **Introduction**

76

77 Methicillin-resistant *Staphylococcus aureus* (MRSA) is a major human pathogen with a propensity  
78 to develop antibiotic resistance, complicating treatment and allowing persistence in environments  
79 where there is antibiotic selection pressure. While multidrug resistance has traditionally been the  
80 domain of healthcare-associated strains, the emergence of strains in the community setting that are  
81 also resistant to multiple antibiotics poses a significant challenge to infection control and public health  
82 (Tong and Kearns 2013). Given the heavy burden and costs associated with MRSA infections (Suaya  
83 et al. 2014; Tong et al. 2015), there is an urgent need to elucidate the patterns and drivers behind the  
84 emergence of drug-resistant community-associated MRSA lineages.

85

86 Over the last few years, several population genomic studies have started to unravel the evolutionary  
87 history of community-associated *S. aureus* lineages emerging in specific regions of the world. The  
88 prototype of these clones is the diverse USA300 lineage (ST8), forming distinct genetic lineages in  
89 North America and South America (Planet et al. 2013; Planet et al. 2015), including distinct clades  
90 in Europe and Africa (Strauß et al. 2017). The East-Asia clone (ST59) has diverged into two distinct  
91 lineages, with evidence of establishment in Taiwan and North America (Ward et al. 2016), while the  
92 ST80 lineage originated in North Africa, but went through a notable population expansion to become  
93 the dominant community-associated lineage in North Africa, the Middle East and Europe (Stegger et  
94 al. 2014). On the Australian continent, the Queensland clone (ST93) emerged in Indigenous  
95 communities of Western Australia and the Northern Territory, spread to the eastern seaboard and  
96 sporadically overseas, but forms a clade associated with Pacific Islander and Maori populations in  
97 New Zealand (van Hal et al. 2018).

98

99 This diversity of regional evolutionary histories is reflected in the various factors that have been  
100 suggested to contribute to the emergence and establishment of community-associated clones. For  
101 instance, acquisition of Panton-Valentine leucocidin (PVL), a mutation in the capsule gene *cap5D*  
102 and acquisition of the *SCCmec-IV* and ACME / COMER elements played a defining role in the  
103 regional evolution of USA300 (Strauß et al. 2017). While acquisition of a typical *SCCmec-IV* element  
104 was also associated with the emergence of the eastern seaboard clade of the Queensland clone, it  
105 appears that host population factors similar to those associated with the emergence in Indigenous  
106 populations of Australia were a possible driver in the establishment of Pacific Islander associated  
107 clade in New Zealand (van Hal et al. 2018). In contrast, the population expansion of the ST80 lineage  
108 was linked to the acquisition of a *SCCmec-IV* and fusidic acid resistance, and enrichment of  
109 resistance determinants in the Taiwan clade suggest a strong contribution for its emergence and

110 persistence in East-Asia. While there is some evidence from these studies that resistance acquisition  
111 can be a driving force behind the regional emergence of community-associated MRSA clones, there  
112 is a lack of data on strains from critical regions that are considered hot-spots for the emergence of  
113 multidrug resistant pathogens, such as the Indian subcontinent.

114

115 In 2004, a novel *S. aureus* clone designated sequence type (ST) 772 was isolated from hospitals in  
116 Bangladesh (Afroz et al. 2008) and from a community-setting study in India (Goering et al. 2008).  
117 The clone continued to be reported in community- and healthcare-associated environments in India,  
118 where it has become one of the dominant epidemic lineages of community-associated MRSA (Chen  
119 and Huang 2014). Similar to other *S. aureus*, ST772 primarily causes skin and soft tissue infections,  
120 but more severe manifestations such as bacteraemia and necrotising pneumonia have been observed.  
121 Its potential for infiltration into nosocomial environments (D'Souza et al. 2010; Manoharan et al.  
122 2012; Nadig et al. 2012; Blomfeldt et al. 2017) and resistance to multiple classes of commonly used  
123 antibiotics (including aminoglycosides,  $\beta$ -lactams, fluoroquinolones, macrolides and trimethoprim)  
124 (Chakrakodi et al. 2014; Steinig et al. 2015; Blomfeldt et al. 2017) has made ST772 an alarming  
125 public health concern on the Indian subcontinent and elsewhere. Over the last decade, the clone has  
126 been isolated from community- and hospital-environments in Asia, Australasia, Africa, the Middle  
127 East and Europe (SI Map 1, SI Table 1). As a consequence of its discovery, distribution and  
128 epidemiology, the lineage has been informally dubbed the “Bengal Bay clone” (Ellington et al. 2010).  
129 Despite clinical and epidemiological hints for a recent and widespread dissemination of ST772, a  
130 unified perspective on the global evolutionary history and emergence of the clone is lacking.

131

132 Here, we analyse whole genome sequences from a globally representative collection of 340 ST772  
133 strains to elucidate the key events associated with the emergence and global spread of a multidrug  
134 resistant community-associated MRSA clone. Our analysis suggests that the clone originated on the  
135 Indian subcontinent in the 1970s and rapidly expanded through the 1990s and early 2000s. We found  
136 that international travel and family connections (India, Bangladesh, Nepal and Pakistan) in the region  
137 were closely linked with the global spread of the lineage. Genome integration of a multidrug  
138 resistance plasmid appeared to be a driver in the emergence of a dominant clade (ST772-A) in the  
139 early 1990s.

140

## 141 **Results**

142

143 We generated whole genome sequence data of 354 *S. aureus* ST772 isolates collected across  
144 Australasia, South Asia, Hong Kong, the Middle East and Europe between 2004 and 2013 (SI Map

145 2, SI Table 2). Fourteen isolates were excluded after initial quality control due to contamination (SI  
146 Tables 2, 3). The remainder mapped with 165x average coverage against the PacBio reference  
147 genome DAR4145 (Steinig et al. 2015) from Mumbai (SI Tables 2, 3). Phylogenetic analysis using  
148 core-genome SNPs (n = 7,063) revealed little geographic structure within the lineage (Fig. 1a). Eleven  
149 ST772 methicillin-susceptible *S. aureus* (MSSA) and MRSA strains were basal to a single globally  
150 distributed clade (ST772-A, n = 329) that harbored an integrated resistance plasmid (IRP) described  
151 in the reference genome DAR4145 (Steinig et al. 2015) (Figs. 1a, 1b). Population network analysis  
152 distinguished three distinct subgroups within ST772-A (Figs. 1a, 1c): an early-branching subgroup  
153 harboring multiple subtypes of the staphylococcal chromosome cassette (*SCCmec-V*) (A1, n = 81), a  
154 dominant subgroup (A2, n = 153) and an emerging subgroup (A3, n = 56), that both exclusively  
155 harbor a short variant of *SCCmec-V*.

156

### 157 **Emergence and global spread from the Indian subcontinent**

158

159 Epidemiological and genomic characteristics of ST772 were consistent with an evolutionary origin  
160 from the Indian subcontinent. Sixty percent of isolates in this study were collected from patients with  
161 family- or travel-background in Bangladesh, India, Nepal or Pakistan, compared to unknown (19%)  
162 or other countries (21%) (Fig. 2a, SI Table 2). We found significantly more isolates from India and  
163 Bangladesh among the basal strains, compared to clade ST772-A (Fisher's exact test, 5/11 vs. 47/291,  
164  $p = 0.026$ ). In particular, three isolates from India and Bangladesh were basal in the (outgroup-rooted)  
165 maximum-likelihood phylogeny (Figs. 1b, S1), including two MSSA samples from the original  
166 isolations in 2004 (RG28, NKD22). Isolates recovered from South Asia were genetically more diverse  
167 than isolates from Australasia and Europe, supporting an origin from the Indian subcontinent (Figs.  
168 2b, S2).

169

170 Consistent with a methicillin-susceptible progenitor, a significantly higher proportion of MSSA was  
171 found in the basal isolates (Fisher's exact test, 4/11 vs. 31/291,  $p = 0.028$ ) and MSSA isolates  
172 demonstrated a lower patristic distance to the root of the maximum likelihood phylogeny compared  
173 to MRSA (Fig. S3a). Although it appears that MSSA is proportionately more common in South Asia  
174 (Fig. S3b), it is also possible that the observed distribution may be related to non-structured sampling.

175

176 Phylogenetic dating suggests an initial divergence of the ancestral ST772 population in 1970 (age of  
177 root node: 1970.02, CI: 1955.43 – 1982.60) with a core-genome substitution rate of  $1.61 \times 10^{-6}$   
178 substitutions/site/year after removing recombination (Figs. 3a, 3b, S4, S5). This was followed by the  
179 emergence of the dominant clade ST772-A and its population subgroups in the early 1990s (ST772-

180 A divergence, 1990.83, 95% CI: 1980.38 – 1995.08). The geographic pattern of dissemination is  
181 heterogeneous (Fig. 1a). There was no evidence for widespread endemic dissemination of the clone  
182 following intercontinental transmission, although localised healthcare-associated outbreak clusters  
183 occurred in neonatal intensive care units in Ireland (NICU-1 and NICU-2, Figs. 1a, S6) (Brennan et  
184 al. 2012) and have been reported from other countries in Europe (Blomfeldt et al. 2017) and South  
185 Asia (D’Souza et al. 2010; Manoharan et al. 2012; Nadig et al. 2012). While some localised spread  
186 in the community was observed among our isolates, patients in local transmission clusters often had  
187 traveled to or had family in South Asia (19/27 clusters, Fig. S6).

188

### 189 **Antibiotic resistance acquisition is associated with emergence and dissemination**

190

191 We examined the distribution of virulence factors, antibiotic resistance determinants and mutations  
192 in coding regions to identify the genomic drivers in the emergence and dissemination of ST772.  
193 Nearly all isolates (336/340) carried the Panton-Valentine leucocidin (PVL) genes *lukS/F*, most  
194 isolates (326/340) carried the associated enterotoxin A (*sea*) and all isolates carried *scn* (SI Table 5).  
195 This indicates a nearly universal carriage, across all clades, of both, a truncated *hly*-converting  
196 prophage (the typically associated staphylokinase gene *sak* was only present in one isolate) and the  
197 PVL/*sea* prophage  $\phi$ -IND772 (Prabhakara et al. 2013a). Amongst other virulence factors, the  
198 enterotoxin genes *sec* and *sel*, the gamma-hemolysin locus, *egc* cluster enterotoxins and the  
199 enterotoxin homologue ORF CM14 were ubiquitous in ST772 (SI Table 7). We detected no  
200 statistically significant difference between core virulence factors present in the basal group and  
201 ST772-A (SI Table 5, Fig. S7).

202

203 We noted a pattern of increasing antimicrobial resistance as successive clades of ST772 emerged.  
204 Predicted resistance phenotypes across ST772 were common for ciprofloxacin (97.4%), erythromycin  
205 (96.2%), gentamicin (87.7%), methicillin (89.7%), penicillin (100%) and trimethoprim (98.8%), with  
206 a corresponding resistome composed of acquired and chromosomally encoded genes and mutations  
207 (Figs. 4a, 4b, SI Table 6). There was significantly less predicted resistance in the basal strains  
208 compared to ST772-A, including overall multidrug-resistance ( $\geq 3$  classes, 8/11 vs. 291/291, Fisher’s  
209 exact test,  $p < 0.001$ ) (Fig. 5a). The key resistance determinants of interest were the SCC*mec* variants,  
210 an integrated resistance plasmid, and other smaller mobile elements and point mutations.

211

212 MRSA isolates predominantly harbored one of two subtypes of SCC*mec*-V: a short variant (5C2) or  
213 a composite cassette (5C2&5), which encodes a type 5 *ccr* complex containing *ccrCI* (allele 8)  
214 between the *mec* gene complex and *orfX* (Balakuntla et al. 2014) (Fig. S8). Integration of the Tn4001

215 transposon encoding aminoglycoside resistance gene *aadA-aphD* occurred across isolates with  
216 different SCCmec types (260/267), but not in MSSA (0/35). All MRSA isolates (n = 7) within the  
217 basal group carried the larger composite cassette SCCmec-V (5C2&5), with two of these strains  
218 lacking *ccrC* and one isolate carried a remnant of SCCmec-IV (Fig. 1a).

219  
220 The diversity of SCCmec types decreased as ST772-A diverged into subgroups (Figs. 1a, 1c, SI Table  
221 6). ST772-A1 included MSSA (n = 30) as well as SCCmec-V (5C2) (n = 22) and (5C2&5) (n = 18)  
222 strains. Four isolates harbored a putative composite SCC element that included SCCmec-V (5C2), as  
223 well as *pls* and the *kdp* operon previously known from SCCmec-II. One isolate harbored a composite  
224 SCCmec-V (5C2&5) with copper and zinc resistance elements, known from the European livestock  
225 associated CC398-MRSA (Schijffelen et al. 2010). Another six isolates yielded irregular and/or  
226 composite SCC elements (SI Table 6). In contrast, the dominant subgroups ST772-A2 and -A3  
227 exclusively carried the short SCCmec-V (5C2) element. Eleven of these isolates (including all isolates  
228 in NICU-2) lacked *ccrC* and two isolates carried additional recombinase genes (*ccrA/B2* and *ccrA2*).

229  
230 ST772-A was characterized by the acquisition of an integrated multidrug resistance plasmid (IRP,  
231 Fig. 5b), encoding the macrolide-resistance locus *msrA / mphC*, as well as determinants against  $\beta$ -  
232 lactams (*blaZ*), aminoglycosides (*aadE-sat4-aphA3*) and bacitracin (*bcrAB*). Thus predicted  
233 resistance to erythromycin was uniquely found in ST772-A and not in any of the basal strains  
234 (Fisher's exact test, 289/291 vs 0/11,  $p < 0.001$ , Fig. 5a). The mosaic IRP element was highly similar  
235 to a composite extrachromosomal plasmid in ST8 (USA300) (Kennedy et al. 2010) and a SCCmec  
236 integration in the J2 region of the ST80 (Stegger et al. 2012) reference genome (Fig. 5b, SI File 1). A  
237 search of closed *S. aureus* genomes (n = 274) showed that the element is rare and predominantly  
238 plasmid-associated across ST8 genomes (6/274), with one chromosomal integration in the ST772  
239 reference genome and the SCCmec integration in the ST80 reference genome (SI Table 9).

240  
241 Three basal strains were not multi-drug resistant and included two isolates from the original  
242 collections in India (RG28) and Bangladesh (NKD122) (Figs. 1a, 4a). These two strains lacked the  
243 trimethoprim determinant *dfrG* and the fluoroquinolone mutations in *grrA* or *gyrA*, encoding only a  
244 penicillin-resistance determinant *blaZ* on a Tn554-like transposon. However, seven of the strains  
245 more closely related to ST772-A did harbor mobile elements and mutations conferring trimethoprim  
246 (*dfrG*) and quinolone resistance (*grrA* and *gyrA* mutations). Interestingly, we observed a shift from  
247 the quinolone resistance *grrA* S80F mutation in basal strains and ST772-A1, to the *grrA* S80Y  
248 mutation in ST772-A2 and -A3 (Fig. 4a).

249

250 Thus, the phylogenetic distribution of the key resistance elements suggests acquisition of the IRP by  
251 a PVL-positive MSSA strain in the early 1990s (ST772-A1 divergence, 1990.83, 95% CI: 1980.38 –  
252 1995.08), followed by fixation of both the shorter variant of *SCCmec-V* (5C2) and the *grlA* S80Y  
253 mutation in a PVL- and IRP-positive MSSA ancestor in the late 1990s (ST772-A2 divergence,  
254 1999.18, 95% CI: 1993.26 – 2001.56) (Figs. 1a, 3a).

255

## 256 **Canonical mutations and phenotypic comparison of basal strains and ST772-A**

257

258 We found three other mutations of interest that were present exclusively in ST772-A strains (SI Table  
259 7). The first mutation caused a non-synonymous change in *fbpA* (L55P), encoding a fibrinogen-  
260 binding protein that mediates surface adhesion in *S. aureus* (Cheung et al. 1995). The second  
261 comprised a non-synonymous change (L67V) in the *plc* gene, encoding a phospholipase associated  
262 with survival in human blood cells and abscess environments in USA300 (White et al. 2014). The  
263 third encoded a non-synonymous mutation (S273G) in *tet(38)*, an efflux pump that promotes  
264 resistance to tetracyclines as well as survival in abscess environments and skin colonization (Truong-  
265 Bolduc et al. 2014). The functional implication of genes harboring these canonical mutations might  
266 suggest a modification of the clone's ability to colonise and cause SSTIs.

267

268 In light of these canonical SNPs, we selected five basal strains and 10 strains from ST772-A to screen  
269 for potential phenotypic differences that may contribute to the success of ST772-A. We assessed *in*  
270 *vitro* growth, biofilm formation, cellular toxicity, and lipase activity (Fig. 6, SI Table 8). We found  
271 no statistically significant differences between the basal strains and ST772-A in these phenotypic  
272 assays, apart from significantly lower lipase activity among ST772-A strains (Welch's two-sided t-  
273 test,  $t = 3.4441$ ,  $df = 6.0004$ ,  $p = 0.0137$ ), which may be related to the canonical non-synonymous  
274 mutation in *plc*. However, it is increased rather than decreased lipase activity that has been associated  
275 with viability of *S. aureus* USA300 in human blood and neutrophils (White et al. 2014). We found  
276 no difference in the median growth rate of ST772-A compared to the basal strains (Mann-Whitney,  
277  $W = 27$ ,  $p = 0.8537$ ), although there were two ST772-A strains that grew more slowly suggesting the  
278 possibility of some strain to strain variability.

279

## 280 **Discussion**

281

282 In this study, we used whole genome sequencing in combination with epidemiological and phenotypic  
283 data to investigate the drivers behind the emergence and spread of a multidrug resistant community-  
284 associated MRSA lineage from the Indian subcontinent. Our data suggests that the Bengal Bay clone



285 has acquired the multidrug phenotype of traditional healthcare-associated MRSA, but retains the  
286 epidemiological characteristics of community-associated MRSA.

287

288 Emergence of a basal population of ST772 appears to have occurred on the Indian subcontinent in  
289 the early 1970s and included strains from the original isolations of ST772 in Bangladesh and India in  
290 2004. Recent studies have detected ST772-MSSA and -MRSA in Nepal (Pokhrel et al. 2017) and  
291 ST772-MRSA in Pakistan (Madzgalla et al. 2016) also, but it is unclear whether the lineage has been  
292 endemic in these countries prior to its emergence in India. Deeper genomic surveillance of ST772-  
293 MSSA and -MRSA in the region will be necessary to understand the local epidemiology and  
294 evolutionary history of the clone on the Indian subcontinent.

295

296 Establishment and expansion of a single dominant clade (ST772-A) occurred in the early 1990s and  
297 was associated with the acquisition of an integrated multidrug resistance MGE. The element is similar  
298 to a previously described extrachromosomal plasmid of USA300 (Kennedy et al. 2010) and a partially  
299 integrated element in the *SCCmec* of a ST80 reference genome (Stegger et al. 2012). While the  
300 element was found only once in the ST80 lineage (Stegger et al. 2014) and occurs predominantly on  
301 plasmids in closed ST8 (USA300) genomes, its distribution and contribution to the emergence of  
302 resistance in the ST8 lineage has so far not been addressed (Planet et al. 2013; Strauß et al. 2017). In  
303 contrast, the ubiquitous occurrence and retention of the element in ST772-A suggests that it was  
304 instrumental to the emergence of the dominant clade of the Bengal Bay clone.

305

306 We observed a lack of significant differences in growth between basal strains and the divergent clade  
307 ST772-A. This may suggest that acquisition of drug resistance on this element was not accompanied  
308 by a major fitness cost to ST772-A and raises the possibility that members of this clade will survive  
309 in environments where antibiotics are heavily used, such as hospitals or in communities with poor  
310 antibiotic stewardship, but may also be at little disadvantage in environments where there is less  
311 antibiotic use, because its growth rate is comparable to that of non-resistant strains. However, it  
312 should be noted that growth assays were conducted *in vitro* and under nutrient-rich conditions that  
313 are unlikely to capture anything but very high fitness costs.

314

315 Furthermore, we observed a replacement of the long composite *SCCmec-V* (5C2&5) element with  
316 the shorter *SCCmec-V* (5C2) and fixation of the quinolone resistance mutation from *grlA* S80F to the  
317 *grlA* S80Y as ST772 diverged into its population subgroups in the 1990s. In light of earlier studies  
318 demonstrating a fitness advantage in having a smaller *SCCmec* element (Ender et al. 2004; Lee et al.  
319 2007; Collins et al. 2010), the fixation of the shorter *SCCmec-V* (5C2) may be a contributing factor

320 to the success of ST772. We speculate that these changes may have allowed the clone to retain its  
321 multidrug resistant phenotype without potentially incurring a significant fitness cost. Further work is  
322 required to investigate the role of resistance dynamics in the evolution and fitness potential of ST772.

323

324 Given the available epidemiological data, phylogeographic heterogeneity and the clone's limited  
325 success to establish itself in regions outside its endemic range in South Asia (Fig. 1a), there appears  
326 to be ongoing exportation of ST772 from the Indian subcontinent, associated with travel and family  
327 background in the region. This is supported by reports of MRSA importation in travelers, including  
328 direct observations of ST772 importation by returnees from India (Zanger et al. 2012). Our data  
329 suggest non-endemic spread within households and the community, including short-term outbreaks  
330 at two NICUs in Ireland. This pattern of limited endemic transmission is supported by reports of small  
331 transmission clusters in hospitals and households during a comprehensive surveillance study of  
332 ST772 in Norway (Blomfeldt et al. 2017). The rapid emergence, global exportation and patterns of  
333 local transmission, together with a relatively homogenous genotype, emphasize the clone's  
334 transmissibility.

335

336 Overall, the pattern of spread mirrors other community-associated MRSA lineages such as USA300  
337 (Nimmo 2012; Planet et al. 2015), ST80-MRSA (Stegger et al. 2014) and ST59 (Ward et al. 2016)  
338 where clones emerge within a particular geographic region, are exported elsewhere, but rarely become  
339 established and endemic outside of their place of origin. In contrast, healthcare-associated MRSA  
340 clones such as CC22-MRSA-IV (EMRSA-15) (Holden et al. 2013) and ST239-MRSA-III (Harris et  
341 al. 2010; Castillo-Ramírez et al. 2012) demonstrate much stronger patterns of phylogeographic  
342 structure, consistent with importation into a country followed by local dissemination through the  
343 healthcare system. While there are indications for resistance acquisition driving regional community-  
344 associated lineages, such as the Taiwan clade of ST59 (Ward et al. 2016), we found strong evidence  
345 in our study that the acquisition of mutations and mobile elements associated with multidrug  
346 resistance were the dominant driver behind the emergence of the Bengal Bay clone on the Indian  
347 subcontinent and its subsequent intercontinental transmission. Moreover, we observed an unusual,  
348 near complete lack of phylogeographic structure in the population, compared to other previously  
349 investigated community-associated clones, providing evidence for ongoing circulation and  
350 exportation from the Indian subcontinent followed by limited endemic transmission.

351

352 Our data traces the evolution of the Bengal Bay clone on the Indian subcontinent, where it emerged  
353 in the 1970s and diverged into a single dominant clade in the 1990s, becoming the  
354 dominant community-associated MRSA lineage in India. Its rapid emergence was driven by the

355 dissemination of mobile genetic elements, particularly those that confer drug-resistance, such as the  
356 acquisition of a multidrug-resistance integrated plasmid and variants of *SCCmec*. Patient  
357 epidemiology and phylogenetic heterogeneity suggest a pattern of ongoing exportation from the  
358 Indian subcontinent and limited endemic transmission after importation. The Bengal Bay clone  
359 therefore appears to combine the epidemiological characteristics of community-associated MRSA  
360 lineages with an unusually resistant genotype traditionally seen in healthcare-associated MRSA.

361

362 Considering the widespread use of antibiotics and associated poor antibiotic regulation, poor public  
363 health infrastructure, and high population density in parts of South Asia, the emergence and global  
364 dissemination of multidrug resistant bacterial clones (both Gram-positive and Gram-negative) is  
365 alarming, and perhaps not surprising. Global initiatives and funding to monitor the occurrence of  
366 emerging clones and resistance mechanisms, and support for initiatives in antimicrobial stewardship  
367 at community, healthcare and agricultural levels are urgently needed.

368

## 369 **Materials and Methods**

370

371 **Isolates:** Isolates were obtained from Australia (21), Bangladesh (3), Denmark (70), England (103),  
372 Germany (16), Hong Kong (6), India (44), Ireland (28), Italy (2), Netherlands (4), New Zealand (17),  
373 Norway (3), Saudi Arabia (1), Scotland (29) and the United Arab Emirates (1) between 2004 and  
374 2012 (SI Table 2). The collection was supplemented with six previously published genome sequences  
375 from India (Prabhakara et al. 2012; Prabhakara et al. 2013b; Balakuntla et al. 2014). Notable samples  
376 include the initial isolates from Bangladesh and India (Afroz et al. 2008; Goering et al. 2008), two  
377 hospital-associated (NICU) clusters from Ireland (Brennan et al. 2012) and longitudinal isolates from  
378 a single healthcare worker at a veterinary clinic sampled over two consecutive weeks (VET) (Paterson  
379 et al. 2015). Geographic regions were designated as Australasia (Australia, New Zealand), East Asia  
380 (Hong Kong), South Asia (India, Bangladesh), Arabian Peninsula (Saudi Arabia, United Arab  
381 Emirates) and Europe (Denmark, England, Germany, Ireland, Italy, Netherlands, Norway and  
382 Scotland).

383

384 **Clinical data and epidemiology:** Anonymised patient data was obtained for the date of collection,  
385 clinical symptoms, geographic location, epidemiological connections based on family or travel-  
386 history, and acquisition in nosocomial- or community-environments, where available (SI Table 2).  
387 Clinical symptoms were summarized as SSTI (abscesses, boils, ulcers, exudates, pus, ear and eye  
388 infections), urogenital- (vaginal swabs, urine), bloodstream- (bacteremia) or respiratory-infections  
389 (pneumonia, lungs abscesses) and colonization (swabs from ear, nose, throat, perineum or

390 environment) (SI Table 2, Fig. S9). Literature and sample maps (SI Maps 1 and 2) were constructed  
391 with *geonet*, a wrapper for geographic projections with Leaflet in R  
392 (<https://github.com/esteinig/geonet>).

393

394 Where available, acquisition in community- or healthcare-environments was recorded in accordance  
395 with guidelines from the CDC. Community-associated MRSA is therein classified as an infection in  
396 a person who has none of the following established risk factors for MRSA infection: isolation of  
397 MRSA more than 48 h after hospital admission; history of hospitalization, surgery, dialysis or  
398 residence in a long-term care facility within one year of the MRSA culture date; the presence of an  
399 indwelling catheter or a percutaneous device at the time of culture; or previous isolation of MRSA  
400 (Fridkin et al. 2005; Morrison et al. 2006) (Fig. S9).

401

402 A valid epidemiological link to South Asia was declared if either travel- or family-background could  
403 be reliably traced to Bangladesh, India, Nepal or Pakistan. If both categories (travel and family) were  
404 unknown or one did not show a link to the region, we conservatively declared the link as unknown or  
405 absent, respectively. The longitudinal collection (n = 39) from a staff member at a veterinary hospital  
406 in England was treated as a single patient sample.

407

408 **Sequencing, quality control and assembly:** Unique index-tagged libraries were created for each  
409 isolate, and multiplexed libraries were sequenced on the Illumina HiSeq with 100 bp paired-end reads.  
410 Samples from the veterinary staff member were processed and sequenced as described by Paterson et  
411 al. (Paterson et al. 2015). Read quality control was conducted with Trimmomatic (Bolger et al. 2014),  
412 Kraken (Wood and Salzberg 2014) and FastQC  
413 (<https://www.bioinformatics.babraham.ac.uk/projects/fastqc>). Quality control identified a large  
414 proportion of reads classified as *Enterococcus faecalis* in sample HWM2178 (SI Table 3). *In silico*  
415 micro-array typing (see below) identified an additional 13 isolates with possible intra-specific  
416 contamination due to simultaneous presence of *agr I* and *II*, as well as capsule types 5 and 8 (SI Table  
417 2). We excluded these isolates from all genomic analyses. Raw Illumina data were sub-sampled to  
418 100x coverage and assembled with the SPAdes (Bankevich 2012) pipeline Shovill  
419 (<https://github.com/tseemann/shovill>), which wraps SPAdes, Lighter (Song et al. 2014), FLASH  
420 (Magoč and Salzberg 2011), BWA MEM (Li 2013), SAMtools (Li et al. 2009), KMC (Deorowicz et  
421 al. 2015) and Pilon (Walker et al. 2014). Final assemblies were annotated with Prokka v1.11 (Seemann  
422 2014).

423

424 **MLST and SCC typing:** *In silico* multi-locus sequence typing (MLST) was conducted using mlst

425 (<https://github.com/tseemann/mlst>) on the assembled genomes with the *S. aureus* database from  
426 PubMLST (<https://pubmlst.org/saureus/>). Three single locus variants (SLVs) of ST772 were detected  
427 and retained for the analysis, describing sequence types ST1573, ST3362 and ST3857 (SI Table 2).  
428 Sequences of experimentally verified sets of probes for SCC- related and other *S. aureus* specific  
429 markers (Monecke et al. 2011; Monecke et al. 2016) were blasted against SPAdes assemblies (*in*  
430 *silico* micro-array typing), allowing prediction of presence or absence of these markers and detailed  
431 typing of SCC elements. We assigned MRSA to four isolates that failed precise SCC classification  
432 based on presence of *mecA* on the probe array and detection of the gene with Mykrobe predictor  
433 (Bradley et al. 2015).

434

435 **Variant calling:** Samples passing quality control (n = 340) were aligned to the PacBio reference  
436 genome DAR4145 from Mumbai and variants were called with the pipeline Snippy (available at  
437 <https://github.com/tseemann/snippy>) which wraps BWA MEM, SAMtools, SnpEff (Cingolani et al.  
438 2012) and Freebayes (Garrison and Marth 2012). Core SNPs were defined as being present in all  
439 samples (ignoring insertions and deletions, n = 7,063) and were extracted with *snippy-core* at default  
440 settings. We assigned canonical SNPs for ST772-A, as those present exclusively in all isolates of  
441 ST772-A, but not in the basal strains. Annotations of variants were based on the reference genome  
442 DAR4145.

443

444 **Phylogenetics and recombination:** A maximum-likelihood (ML) tree under the General Time  
445 Reversible model of nucleotide substitution with among-site rate heterogeneity across 4 categories  
446 (GTR +  $\Gamma$ ), ascertainment bias correction (Lewis) and 100 bootstrap (BS) replicates was generated  
447 based on 7,063 variant sites (core-genome SNPs) in RaxML-NG 0.5.0 (available at  
448 <https://github.com/amkozlov/raxml-ng>), which implements the core functionality of RAxML  
449 (Stamatakis 2014). The tree with the highest likelihood out of ten replicates was midpoint-rooted and  
450 visualized with interactive Tree of Life (ITOL) (Figs. 1a, 2a, S6, S12a) (Letunic and Bork 2007). In  
451 all phylogenies (Figs. 1a, 2a, 3a, S6, S10, S12a) samples from the veterinary staff member were  
452 collapsed for clarity.

453

454 A confirmation alignment (n = 351) was computed as described above for resolving the pattern of  
455 divergence in the basal strains of ST772. The alignment included the CC1 strain MW2 as outgroup,  
456 as well as another known SLV of CC1, sequence type 573 (n = 10). The resulting subset of core SNPs  
457 (n = 25,701) was used to construct a ML phylogeny with RaxML-NG (GTR +  $\Gamma$ ) and 100 bootstrap  
458 replicates (Fig. S1). We also confirmed the general topology of our main phylogeny as described  
459 above using the whole genome alignment of 2,545,215 nucleotides generated by Snippy, masking

460 sites if they contained missing (-) or uncertain (N) characters across ST772.

461

462 Gubbins (Croucher et al. 2015) was run on a complete reference alignment with all variant sites  
463 defined by Snippy to detect homologous recombination events, using a maximum of five iterations  
464 and the GTR +  $\Gamma$  model in RaxML (Fig. S10). A total of 205 segments were identified as recombinant  
465 producing a core alignment of 7,928 SNPs. Phylogenies were visualized using ITOL, *ape* (Paradis et  
466 al. 2004), *phytools* (Revell 2012), *ggtree* (Yu et al. 2017) or *plotTree*  
467 (<https://github.com/holtlab/plotTree/>). Patristic distances to the root of the phylogeny (Fig. S2) were  
468 computed in the *adephylo* (Jombart et al. 2010) function *distRoot*.

469

470 **Dating analysis:** We used LSD v0.3 (To et al. 2016) to obtain a time-scaled phylogenetic tree. This  
471 method fits a strict molecular clock to the data using a least-squares approach. Importantly, LSD does  
472 not explicitly model rate variation among lineages and it does not directly account for phylogenetic  
473 uncertainty. However, its accuracy is similar to that obtained using more sophisticated Bayesian  
474 approaches (Duchêne et al. 2016), with the advantage of being computationally less demanding.

475

476 LSD typically requires a phylogenetic tree with branch lengths in substitutions per site, and  
477 calibrating information for internal nodes or for the tips of the tree. We used the phylogenetic tree  
478 inferred using Maximum likelihood in PhyML (Guindon et al. 2010) (before and after removing  
479 recombination with Gubbins, as described above) using the GTR+ $\Gamma$  substitution model with 4  
480 categories for the  $\Gamma$  distribution. We used a combination of nearest-neighbour interchange and  
481 subtree-prune-regraft to search tree space. Because PhyML uses a stochastic algorithm, we repeated  
482 the analyses 10 times and selected that with the highest phylogenetic likelihood. To calibrate the  
483 molecular clock in LSD, we used the collection dates of the samples (i.e. heterochronous data). The  
484 position of the root can be specified *a priori*, using an outgroup or by optimising over all branches.  
485 We chose the latter approach. To obtain uncertainty around node ages and evolutionary rates we used  
486 the parametric bootstrap approach with 100 replicates implemented in LSD.

487

488 An important aspect of analysing heterochronous data is that the reliability of estimates of  
489 evolutionary rates and timescales is contingent on whether the data have temporal structure. In  
490 particular, a sufficient amount of genetic change should have accumulated over the sampling time.  
491 We investigated the temporal structure of the data by conducting a regression of the root-to-tip  
492 distances of the Maximum likelihood tree as a function of sampling time (Korber et al. 2000), and a  
493 date-randomisation test (Ramsden et al. 2009). Under the regression method, the slope of the line is  
494 a crude estimate of the evolutionary rate, and the extent to which the points deviate from the

495 regression line determines the degree of clocklike behaviour, typically measured using the R  
496 (Rambaut et al. 2016). The date randomisation test consists in randomising the sampling times of the  
497 sequences and re-estimating the rate each time. The randomisations correspond to the distribution of  
498 rate estimates under no temporal structure. As such, the data have strong temporal structure if the rate  
499 estimate using the correct sampling times is not within the range of those obtained from the  
500 randomisations (Duchêne et al. 2015). We conducted 100 randomisations, which suggested strong  
501 temporal structure for our data (Fig. S3). We also verified that the data did not display phylogenetic-  
502 temporal clustering, a pattern which sometimes misleads the date-randomisation test (Murray et al.  
503 2016).

504

505 Results from this analysis (substitution rates, and node age estimates) using phylogenies before and  
506 after removing recombination were nearly identical (Figs. S4, S5). We therefore chose to present  
507 results from our analysis after removing recombination.

508

509 **Nucleotide diversity:** Pairwise nucleotide diversity and SNP distance distributions for each region  
510 with  $n > 10$  (Australasia, Europe, South Asia) were calculated as outlined by Stucki et al. (Stucki et  
511 al. 2016). Pairwise SNP distances were computed using the SNP alignment from Snippy ( $n = 7,063$ )  
512 and the *dist.dna* function from *ape* with raw counts and deletion of missing sites in a pairwise fashion.  
513 An estimate of average pairwise nucleotide diversity per site ( $\pi$ ) within each geographic region was  
514 calculated from the SNP alignments using raw counts divided by the alignment length. Confidence  
515 intervals for each region were estimated using 1000 bootstrap replicates across nucleotide sites in the  
516 original alignment via the *sample* function (with replacement) and 2.5% - 97.5% quantile range (Fig.  
517 2b).

518

519 **Population structure:** We used the network-analysis and -visualization tool NetView (Neuditschko  
520 et al. 2012; Steinig et al. 2016) (available at <http://github.com/esteinig/netview>) to delineate  
521 population subgroups in ST772. Pairwise Hamming distances were computed from the core SNP  
522 alignment derived from Snippy. The distance matrix was used to construct mutual k-nearest-  
523 neighbour networks from  $k = 1$  to  $k = 100$ . We ran three commonly used community detection  
524 algorithms as implemented in *igraph* to limit the parameter choice to an appropriate range for  
525 detecting fine-scale population structure: fast-greedy modularity optimization (Girvan and Newman  
526 2002), Infomap (Rosvall and Bergstrom 2008) and Walktrap (Pons and Latapy 2006). We thereby  
527 accounted for differences in the mode of operation and resolution of algorithms. Plotting the number  
528 of detected communities against  $k$ , we were able to select a parameter value at which the results from  
529 the community detection were approximately congruent (Fig. S11).

530

531 Since we were interested in the large-scale population structure of ST772, we selected  $k = 40$  and  
532 used the low-resolution fast-greedy modularity optimisation to delineate final population subgroups.  
533 Community assignments were mapped back to the ML phylogeny of ST772 (Fig. 1a). All subgroups  
534 agreed with the phylogenetic tree structure and were supported by  $\geq 99\%$  bootstrap values (Fig. S12).  
535 One exception was isolate HW\_M2760 located within ST772-A2 by phylogenetic analysis, but  
536 assigned to ST772-A3 by network analysis (Figs. S11, S12). This appeared to be an artefact of the  
537 algorithm, as its location and connectivity in the network representation matched its phylogenetic  
538 position within ST772-A2. The network and communities were visualized using the Fruchterman-  
539 Reingold algorithm (Fig. 1c), excluding samples from the veterinary staff member in Fig. 1c (Fig.  
540 S11).

541

542 **Local transmission clusters:** We obtained approximate transmission clusters by employing a  
543 network approach supplemented with the ML topology and patient data, including date of collection,  
544 location of collection and patient family links and travel or family links to South Asia. We used  
545 pairwise SNP distances to define a threshold of 4 SNPs, corresponding to the maximum possible SNP  
546 distance obtained within one year under a core genome substitution rate of  $1.61 \times 10^{-6}$  nucleotide  
547 substitutions/site/year. We then constructed the adjacency matrix for a graph, in which isolates were  
548 connected by an undirected edge, if they had a distance of less or equal to 4 SNPs. All other isolates  
549 were removed from the graph and we mapped the resulting connected components to the ML  
550 phylogeny, showing that in each case the clusters were also reconstructed in the phylogeny, where  
551 isolates diverged from a recent common ancestor (gray highlights, Figs. 2a, S6). We then traced the  
552 identity of the connected components in the patient meta-data and added this information to each  
553 cluster. NICU clusters were reconstructed under these conditions (Figs. 2a, S6).

554

555 **Antimicrobial resistance, virulence factors and pan-genome analysis:** Mykrobe Predictor was  
556 employed for antibiotic susceptibility prediction and detection of associated resistance determinants  
557 and mutations. Mykrobe Predictor has demonstrated sensitivity and specificity  $> 99\%$  for calling  
558 phenotypic resistance and is comparable to gold-standard phenotyping in *S. aureus* (Bradley et al.  
559 2015). Predicted phenotypes were therefore taken as a strong indication for actual resistance  
560 phenotypes in ST772. Genotype predictions also reflect multidrug resistance profiles  
561 (aminoglycosides,  $\beta$ -lactams, fluoroquinolones, MLS, trimethoprim) reported for this clone in the  
562 literature (Ellington et al. 2010; Brennan et al. 2012; Chakrakodi et al. 2014; Shore et al. 2014; Steinig  
563 et al. 2015; Blomfeldt et al. 2017). As most resistance-associated MGEs in the complete reference  
564 genome DAR4145 are mosaic-like and flanked by repetitive elements (Steinig et al. 2015), we used



565 specific diagnostic genes present as complete single copies in the reference annotation of DAR4145  
566 (Steinig et al. 2015) to define presence of the IRP (*msrA*) and Tn4001 (*aacA-aphD*). Mykrobe  
567 Predictor simultaneously called the *grlA* mutations S80F and S80Y for quinolone resistant  
568 phenotypes. However, in all cases one of the variants was covered at extremely low median k-mer  
569 depth (< 20) and we consequently assigned the variant with higher median k-mer depth at *grlA* (SI  
570 Table 6).

571  
572 ARIBA (Hunt et al. 2017) with default settings and the core Virulence Factor database were used to  
573 detect the complement of virulence factors in ST772. We corroborated and extended our results with  
574 detailed *in-silico* microarray typing, including the presence of the *egc* gene cluster or *S. aureus*  
575 specific virulence factors such as the enterotoxin homologue ORF CM14. Differences in detection of  
576 relevant virulence factors between the *in silico* typing and ARIBA included, amongst others, *lukS/F-*  
577 *PVL* (337 vs. 336), *sea* carried on the  $\phi$ -IND772 prophage (336 vs. 326), *sec* (333 vs 328) and *sak* (1  
578 vs. 2). Since *in silico* microarray typing was based on assembled genomes and may therefore be prone  
579 to assembly errors, we used results from the read-based typing with ARIBA to assess statistical  
580 significance of virulence factors present in basal strains and ST772-A (Fig. S7).

581  
582 Pan-genome analysis was conducted using Prokka annotated assemblies in Roary (Page et al. 2015),  
583 with minimum protein BLAST identity at 95% and minimum percentage for a gene to be considered  
584 core at 99% (Fig. S13). A gene synteny comparison between major SCC*mec* types was plotted with  
585 genoPlotR(Guy et al. 2010) (Fig. S8). A nucleotide BLAST comparison between the  
586 extrachromosomal plasmid 11809-03 of USA300, the integrated resistance plasmid in the ST772  
587 reference genome DAR4145 and the integrated plasmid region in strain 11819-07 of ST80 was  
588 plotted with geneD3 (<https://github.com/esteinig/geneD3/>), showing segments > 1kb (SI File 1).

589  
590 We searched for the three resistance regions which aligned to the 11819-07 and the 11809-03 plasmid  
591 (DAR4145 reference genome; R1: 1456024-1459959 bp, R2: 1443096-1448589 bp and R3:  
592 1449679-1453291 bp) in all completed *S. aureus* genomes (including plasmids) in RefSeq (NCBI)  
593 and the NCTC3000 project (<http://www.sanger.ac.uk/resources/downloads/bacteria/nctc/>) using  
594 nctc-tools (<https://github.com/esteinig/nctc-tools>) and nucleotide BLAST with a minimum of 90%  
595 coverage and identity (n = 273). Since the IRP is mosaic-like and composed of several mobile regions,  
596 we only retained query results, if all three of the regions were detected (SI Table 9). We then traced  
597 the integration sites in the accessions, determining whether integrations occurred the chromosome or  
598 plasmids. Multi-locus sequence types were assigned using *mlst* (<https://github.com/tseemann/mlst>).

599

600 **Growth curves:** *S. aureus* strains were grown overnight in 5 mL tryptic soy broth (TSB, Fluka) with  
601 shaking (180 rpm) at 37 °C. Overnight cultures were diluted 1:1000 in fresh TSB and 200 µL was  
602 added to a 96 – well plate (Costar) in triplicate. Growth was measured 37 °C, with shaking (300 rpm)  
603 using a FLUORostar fluorimeter (BMG Labtech) using an absorbance wavelength of 600 nm.  
604 Growth curves represent the mean of triplicate results.

605  
606 **Cell culture conditions:** The monocyte-macrophage THP-1 cell line was maintained in suspension  
607 in 30 mL Roswell Park Memorial Medium Institute (RPMI-1640) medium, supplemented with 10%  
608 heat-inactivated fetal bovine serum (FBS), 1 µM L-glutamine, 200 units/mL penicillin, and 0.1  
609 mg/mL streptomycin at 37 °C in a humidified incubator with 5% CO<sub>2</sub>. Cells were harvested by  
610 centrifugation at 700 x g for 10 min at room temperature and re-suspended to a final density of 1–1.2  
611 x 10<sup>6</sup> cells/mL in tissue-grade phosphate buffered saline, typically yielding >95 % viable cells as  
612 determined by easyCyte flow cytometry (Millipore).

613  
614 Human erythrocytes were harvested from 10 mL of human blood following treatment in sodium  
615 heparin tubes (BD). Whole blood was centrifuged at 500 x g for 10 min at 4 °C. Supernatant (plasma)  
616 was aspirated and cells were washed twice in 0.9 % NaCl and centrifuged at 700 x g for 10 min. Cell  
617 pellet was gently re-suspended in 0.9 % NaCl and diluted to 1 % (v/v).

618  
619 **Cytotoxicity assay:** To monitor *S. aureus* toxicity, *S. aureus* strains were grown overnight in TSB,  
620 diluted 1:1000 in 5 mL fresh TSB and grown for 18 h at 37 °C with shaking (180 rpm). Bacterial  
621 supernatants were prepared by centrifugation of 1 mL of bacterial culture at 20,000 x g for 10 min.  
622 For assessing toxicity to THP-1 cells, 20 µL of cells were incubated with 20 µL of bacterial  
623 supernatant and incubated for 12 min at 37 °C. Both neat and 30% diluted supernatant (in TSB) were  
624 used as certain *S. aureus* strains were considerably more toxic than others. Cell death was quantified  
625 using easyCyte flow cytometry using the Guava viability stain according to manufacturer's  
626 instructions. Experiments were done in triplicate. For assessing haemolysis, 150 µL of 1% (v/v)  
627 erythrocytes were incubated with 50 µL of either neat and 30% supernatant in a 96 well plate for 30  
628 min at 37°C. Plates were centrifuged for 5 min at 300 x g and 75 µL of supernatant was transferred  
629 to a new plate and absorbance was measured at 404nm using a FLUORostar fluorimeter (BMG  
630 Labtech). Normalised fluorescence was achieved using the equation  $(A_t - A_0) / (A_m / A_0)$  where  $A_t$  is  
631 the haemolysis absorbance value of a strain,  $A_0$  is the minimum absorbance value (negative control  
632 of 0.9% NaCl) and  $A_m$  is the maximum absorbance value (positive control of 1 % triton X-100).

633  
634 **Lipase assay:** Bacterial supernatants used in the above cytotoxicity assays were also used to assess

635 lipase activity, using the protocol published by Cadieux *et al.* (Cadieux *et al.* 2014) with  
636 modifications. Briefly, 8mM *para*-nitrophenyl butyrate (pNPB), the short chain substrate, or *para*-  
637 nitrophenyl palmitate (pNPP), the long chain substrate, (Sigma) was mixed with a buffer (50mM  
638 Tris-HCl (pH 8.0), 1mg/ml gum Arabic and 0.005% Triton-X100) in a 1:9 ratio to create assay mixes.  
639 A standard curve using these assay mixes and *para*-nitrophenyl (pNP) (Sigma) was created, and  
640 200 $\mu$ l of each dilution was pipetted into one well of a 96-well plate (Costar). 180 $\mu$ l of the assay mixes  
641 was pipetted into the remaining wells of a 96-well plate, and 20 $\mu$ l of the harvested bacterial  
642 supernatant was mixed into the wells. The plate was placed in a FLUOstar Omega microplate reader  
643 (BMG Labtech) at 37°C, and a reading at 410nm was taken every 5 min.s for 1h. The absorbance  
644 readings were converted to  $\mu$ M pNP released/min. using the standard curve.

645

646 **Biofilm formation:** Semi-quantitative measurements of biofilm formation on 96-well, round-bottom,  
647 polystyrene plates (Costar) was determined based on the classical, crystal violet method of Ziebuhr  
648 *et al.* (Ziebuhr *et al.* 1997). 18 h bacterial cultures grown in TSB were diluted 1:40 into 100  $\mu$ L TSB  
649 containing 0.5 % glucose. Perimeter wells of the 96-well plate were filled with sterile H<sub>2</sub>O and plates  
650 were placed in a separate plastic container inside a 37°C incubator and grown for 24 h under static  
651 conditions. Following 24 h growth, plates were washed five times in PBS, dried and stained with 150  
652  $\mu$ L of 1% crystal violet for 30 min at room temperature. Following five washes of PBS, wells were  
653 re-suspended in 200  $\mu$ L of 7% acetic acid, and optical density at 595 nm was measured using a  
654 FLUOROstar fluorimeter (BMG Labtech). To control for day to day variability, a control strain (E-  
655 MRSA15) was included on each plate in triplicate, and absorbance values were normalised against  
656 this. Experiments were done using six technical repeats from 2 different experiments.

657

658 **Statistical analysis:** All statistical analyses were carried out in R or python and considered significant  
659 at  $p < 0.05$ , except for comparisons of proportions across the multiple virulence and resistance  
660 elements, which we considered be statistically significant at  $p < 0.01$ . Veterinary samples ( $n = 39$ )  
661 were restricted to one isolate (one patient, Staff\_E1A) for statistical comparison of region of isolation,  
662 proportion of resistance, virulence and MSSA between basal strains and ST772-A ( $n = 302$ , main  
663 text, Figs. 5a, S7). Differences in pairwise SNP distance and nucleotide diversity between all regions  
664 were assessed using non-parametric Kruskal-Wallis test and post-hoc Dunn's test for multiple  
665 comparisons with Bonferroni correction, as distributions were assumed to be not normally distributed  
666 (Fig. 2b,  $n = 340$ , Fig. S2). Phenotypic differences were assessed for normality with Shapiro-Wilk  
667 tests. We consequently used either Welch's two-sided t-test or the non-parametric two-sided  
668 Wilcoxon rank-sum test (Fig. 6, SI Table 8).

669

670 **Data availability:** Core analyses, including parameter settings, cluster resource configurations and  
671 versioned software distributions are reproducible through the *bengal-bay-0.1* workflow, which can  
672 be found along with other scripts and data files at our GitHub repository  
673 (<https://github.com/esteinig/ST772>). The workflow is implemented in Snakemake (Köster and  
674 Rahmann 2012) and runs in virtual environments that include software distributed in the Bioconda  
675 (Dale et al. 2017) channel. Workflow results are summarized in the Supplementary Tables. Analyses  
676 were conducted on the Cheetah cluster at Menzies School of Health Research, Darwin.

677

678 Short-read sequences have been deposited at ENA under accession numbers detailed in SI Table 2.  
679 Additional isolates from India are available from the SRA under accession numbers SRR404118,  
680 SRR653209, SRR653212 and SRR747869-SRR747873. Outgroup strains used in the context  
681 phylogeny are available from ENA under accession numbers SRR592258 (MW2), ERR217298,  
682 ERR217349, ERR221806, ERR266712, ERR279022, ERR279023, ERR278908. ERR279026,  
683 ERR716976, ERR717011 (ST573). The ST772 reference genome DAR4145 is available at GenBank  
684 under accession number CP010526.1.

685

686 **Author contributions:** EJS, ST conducted the bioinformatics analysis; SD performed the dating  
687 analysis; MY, ML, RM conducted phenotyping experiments; SM, PS, PA performed *in silico* typing  
688 and provided bioinformatics support; DS provided support on the computing cluster; DAR, DW, AK,  
689 RG, ED, RE, SM, MI, MO, GC, AP, GB, AS, DC, AP, AM, HdL, HW, NK, HH, BS, FL, SP, SW,  
690 HA, LS, SH provided strains and relevant meta-data; EJS, ST, DAR, SM, MTGH wrote the  
691 manuscript; all authors contributed to critical review of the manuscript. ST directed the project with  
692 support from SB and JP.

693

694 **Acknowledgements:** We thank the library construction, sequencing, and core informatics teams at  
695 the Wellcome Trust Sanger Institute. We also extend our gratitude to Anand Manoharan for  
696 comments on the manuscript and strains from India. This work was supported by the Australian  
697 National Health and Medical Research Council (#1145033 to ST, #1065908 to MO ), by the National  
698 Institute of Health grant (GM080602 to DAR), the Irish Health Research Board (HRA-POR-2015-  
699 1051 to DC and AS).

700

## 701 **Figure Legends**

702

703 **Fig. 1:** Evolutionary history and population structure of ST772. **(a)** Maximum likelihood phylogeny  
704 of ST772 (n = 340) based on 7,063 core-genome SNPs. Branch colors denote country of isolation,

705 the inner ring delineates presence and type of *SCCmec*, the middle ring shows presence of the  
706 integrated resistance plasmid and the outer ring denotes community-membership of the population  
707 graph shown in (c). Communities match the tree topology, with several basal isolates ( $n = 11$ ) and a  
708 single derived clade ST772-A ( $n = 329$ ) composed of three population subgroups (A1 – A3). Isolates  
709 from two outbreaks in neonatal intensive care units in Ireland are indicated in grey (NICU-1 and  
710 NICU-2). Only one representative isolate from longitudinal sampling of a single healthcare worker  
711 ( $n = 39$ ) is included (red circle). **(b)** Basal strains of ST772 showing positions of isolates from India  
712 and Bangladesh at the root of the phylogeny (RG28, DAR4066, NKD122). **(c)** Population graph based  
713 on pairwise SNP distances, showing *SCCmec* type (node color as for Fig. 1a legend) and population  
714 subgroups (polygons, A1-A3). Dashed circles denote hospital-associated outbreaks in Ireland (NICU-  
715 1 and NICU-2).

716

717 **Fig. 2:** Molecular epidemiology of ST772. **(a)** Patient family- or travel-background in South Asia  
718 (India, Pakistan, Nepal, Bangladesh) (59.5%, purple), other countries (21.2%, green) or unknown  
719 status (19.3%, gray), is widely distributed across the phylogenetic topology of ST772 ( $n = 340$ ). Only  
720 one representative isolate from longitudinal sampling of a single healthcare worker ( $n = 39$ ) is  
721 included (circle). **(b)** Average pairwise nucleotide diversity per site ( $\pi$ ), measured by region  
722 (Australasia: orange,  $n = 36$ ; Europe: blue,  $n = 244$ ; South Asia: purple,  $n = 52$ ). Error bars indicate  
723 95% confidence intervals using non-parametric bootstrapping. Isolates from the Arabian Peninsula  
724 ( $n = 2$ ) and Hong Kong ( $n = 6$ ) were excluded from the diversity analysis due to the small number of  
725 samples from these regions.

726

727 **Fig. 3:** Molecular clock estimates in the emergence of ST772 **(a)** Phylogenetic time-tree with the  
728 timescale estimated in Least Squares Dating (LSD). The annotations for nodes represent the time of  
729 origin (in years) of basal strains and subgroups A1, A2, A3. Times to the most recent common  
730 ancestor (TMRCA) for these lineages are shown. Tips are colored according to the subgroup as per  
731 Fig. 1a. The position of the root was optimised during the analysis. Arrows indicate acquisition of  
732 three critical mobile genetic elements: the PVL/*sea*-prophage  $\phi$ -IND772, an integrated multidrug  
733 resistance plasmid and the short staphylococcal cassette chromosome *SCCmec-V* (5C2). **(b)** Times  
734 to the most recent common ancestor of sub-groups in ST772 after removing recombination.  
735 Horizontal bars indicate 95% confidence intervals for nodes (CI) using parametric bootstrapping in  
736 LSD.

737

738 **Fig. 4:** Resistome and predicted resistance phenotypes across ST772. **(a)** Resistome mapped to  
739 maximum likelihood phylogeny of ST772. Predicted resistant phenotype is depicted in red, while

740 susceptible phenotype is depicted in blue. Presence of acquired resistance genes and mutations  
741 responsible for phenotype predictions are shown in red, while absence of these determinants is shown  
742 in gray. (b) Percent of isolates predicted resistant (gray) or susceptible (white) for all antimicrobials  
743 included in Mykrobe predictor

744

745 **Fig. 5:** Integrated resistance plasmid in ST772 (a) BLAST comparison of the multidrug-resistance  
746 plasmid in DAR4145 (middle) with the extrachromosomal plasmid 11809-p03 (top) and the SCC*mec*-  
747 IV integrated plasmid in ST80 (bottom), showing alignments > 1000 bp and > 95% nucleotide  
748 identity. The comparison highlights three regions harboring resistance genes (dark blue) and their  
749 regulators (light blue), which are flanked by transposition elements (green) and appear to have  
750 integrated with reversions and rearrangements into ST80 and ST772. Resistance genes include the  $\beta$ -  
751 lactam *blaZ* complex, aminoglycoside cluster *aphA3-sat4-aadE* and bacitracin resistance loci *bcrA/B*,  
752 as well as macrolide efflux genes *msrA* and *mphC*. Hypothetical proteins and genes of other annotated  
753 function are shown in white and dark gray, respectively. (b) Proportion of isolates predicted resistant  
754 to common antibiotics for basal isolates (white, n = 11) and isolates from ST772-A (gray, n = 291).  
755 Values above bars denote statistically significant differences between groups using Fisher's exact test  
756 where  $p < 0.01$ .

757

758 **Fig. 6:** Phenotypic assays for representative strains from the basal group (white, n = 5) and ST772-A  
759 (gray, n = 10) for (a) optical density measurements (595 nm) of biofilm formation, accounting for  
760 day to day variability relative to control strain E-MRSA15 (%), (b) overnight growth in tryptic soy  
761 broth (doubling time per minute) measured by optical density (600 nm), (c) cytotoxicity of neat  
762 (100%) and diluted (30%) bacterial supernatant to THP-1 cells measured as cell death by flow  
763 cytometry, (d) absorbance measurements (404 nm) of erythrocyte haemolysis in neat (100%) and  
764 diluted (30%) bacterial supernatant, (e) lipase activity of *para*-nitrophenyl butyrate (pNPB) or *para*-  
765 nitrophenyl palmitate (pNPP) (release of pNP per minute) in neat bacterial supernatant measured by  
766 absorbance (410 nm). Slow growing strains H104580604 and HPAS101177P were considered  
767 outliers and removed from the growth boxplot for visual clarity after calculation of median and  
768 interquartile ranges and assessment of significance. Error bars show standard error; the asterisk  
769 denotes a significant difference in pNPP release (Welch's two-sided t-test,  $t = 3.4441$ ,  $df = 6.0004$ ,  $p$   
770  $= 0.0137$ ) between basal strains and ST772.

771

## 772 References

773

774 Afroz S, Kobayashi N, Nagashima S, Alam M, Hossain B, Rahman A, Islam R, Lutfur AB,

- 775 Muazzam N, Khan AH, et al. 2008. Genetic characterization of *Staphylococcus aureus* isolates  
776 carrying Panton-Valentine leukocidin genes in Bangladesh. *Jpn. J. Infect. Dis.* 61:393–396.
- 777 Balakuntla J, Prabhakara S, Arakere G. 2014. Novel rearrangements in the staphylococcal cassette  
778 chromosome mec type V elements of Indian ST772 and ST672 methicillin resistant  
779 *Staphylococcus aureus* strains. de Lencastre H, editor. *PLoS One* 9:e94293.
- 780 Bankevich A. 2012. SPAdes: a new genome assembly algorithm and its applications to single-cell  
781 sequencing. *J Comput Biol* 19:455–477.
- 782 Blomfeldt A, Larssen KW, Moghen A, Gabrielsen C, Elstrøm P, Aamot H V, Jørgensen SB. 2017.  
783 Emerging multidrug-resistant Bengal Bay clone ST772-MRSA-V in Norway: molecular  
784 epidemiology 2004–2014. *Eur. J. Clin. Microbiol. Infect. Dis.* 36:1911–1921.
- 785 Bolger AM, Lohse M, Usadel B. 2014. Trimmomatic: a flexible trimmer for Illumina sequence  
786 data. *Bioinformatics* 30:2114–2120.
- 787 Bradley P, Gordon NC, Walker TM, Dunn L, Heys S, Huang B, Earle S, Pankhurst LJ, Anson L, de  
788 Cesare M, et al. 2015. Rapid antibiotic-resistance predictions from genome sequence data for  
789 *Staphylococcus aureus* and *Mycobacterium tuberculosis*. *Nat. Commun.* 6:10063.
- 790 Brennan GI, Shore AC, Corcoran S, Tecklenborg S, Coleman DC, O’Connell B. 2012. Emergence  
791 of hospital- and community-associated Panton-Valentine leukocidin-positive methicillin-  
792 resistant *Staphylococcus aureus* genotype ST772-MRSA-V in Ireland and detailed  
793 investigation of an ST772-MRSA-V cluster in a neonatal intensive care unit. *J. Clin.*  
794 *Microbiol.* 50:841–847.
- 795 Cadieux B, Vijayakumaran V, Bernards MA, McGavin MJ, Heinrichs DE. 2014. Role of lipase  
796 from community-associated methicillin-resistant *Staphylococcus aureus* strain USA300 in  
797 hydrolyzing triglycerides into growth-inhibitory free fatty acids. *J. Bacteriol.* 196:4044–4056.
- 798 Castillo-Ramírez S, Corander J, Marttinen P, Aldeljawi M, Hanage WP, Westh H, Boye K, Gulay  
799 Z, Bentley SD, Parkhill J, et al. 2012. Phylogeographic variation in recombination rates within  
800 a global clone of methicillin-resistant *Staphylococcus aureus*. *Genome Biol.* 13:126.
- 801 Chakrakodi B, Prabhakara S, Nagaraj S, Etienne J, Arakere G. 2014. High Prevalence of  
802 ciprofloxacin resistance in community associated *Staphylococcus aureus* in a tertiary care  
803 Indian hospital. *Adv. Microbiol.* 04:133–141.
- 804 Chen C-J, Huang Y-C. 2014. New epidemiology of *Staphylococcus aureus* infection in Asia. *Clin.*  
805 *Microbiol. Infect.* 20:605–623.
- 806 Cheung AI, Projan SJ, Edelstein RE, Fischetti VA. 1995. Cloning, expression, and nucleotide  
807 sequence of a *Staphylococcus aureus* gene (fbpA) encoding a fibrinogen-binding protein.  
808 *Infect. Immun.* 63:1914–1920.
- 809 Cingolani P, Platts A, Wang LL, Coon M, Nguyen T, Wang L, Land SJ, Lu X, Ruden DM. 2012. A

- 810 program for annotating and predicting the effects of single nucleotide polymorphisms, SnpEff:  
811 SNPs in the genome of *Drosophila melanogaster* strain w(1118); iso-2; iso-3. Fly (Austin).  
812 6:80–92.
- 813 Collins J, Rudkin J, Recker M, Pozzi C, O’Gara JP, Massey RC. 2010. Offsetting virulence and  
814 antibiotic resistance costs by MRSA. ISME J 4:577–584.
- 815 Croucher NJ, Page AJ, Connor TR, Delaney AJ, Keane JA, Bentley SD, Parkhill J, Harris SR.  
816 2015. Rapid phylogenetic analysis of large samples of recombinant bacterial whole genome  
817 sequences using Gubbins. Nucleic Acids Res. 43:15.
- 818 D’Souza N, Rodrigues C, Mehta A. 2010. Molecular characterization of methicillin-resistant  
819 *Staphylococcus aureus* with emergence of epidemic clones of sequence type (ST) 22 and ST  
820 772 in Mumbai, India. J. Clin. Microbiol. 48:1806–1811.
- 821 Dale R, Grüning B, Sjödin A, Rowe J, Chapman BA, Tomkins-Tinch CH, Valieris R, Köster J.  
822 2017. Bioconda: A sustainable and comprehensive software distribution for the life sciences.  
823 bioRxiv.
- 824 Deorowicz S, Kokot M, Grabowski S, Debudaj-Grabysz A. 2015. KMC 2: fast and resource-frugal  
825 k-mer counting. Bioinformatics 31:1569–1576.
- 826 Duchêne S, Duchêne D, Holmes EC, Ho SYW. 2015. The performance of the date-randomization  
827 test in phylogenetic analyses of time-structured virus data. Mol. Biol. Evol. 32:1895–1906.
- 828 Duchêne S, Geoghegan JL, Holmes EC, Ho SYW. 2016. Estimating evolutionary rates using time-  
829 structured data: a general comparison of phylogenetic methods. Bioinformatics 32:3375–3379.
- 830 Ellington M, Ganner M, Warner M, Cookson BD, Kearns AM. 2010. Polyclonal multiply  
831 antibiotic-resistant methicillin-resistant *Staphylococcus aureus* with Panton-Valentine  
832 leucocidin in England. J. Antimicrob. Chemother. 65:46–50.
- 833 Ender M, McCallum N, Adhikari R, Berger-Bächi B. 2004. Fitness cost of SCCmec and methicillin  
834 resistance levels in *Staphylococcus aureus*. Antimicrob. Agents Chemother. 48:2295–2297.
- 835 Fridkin SK, Hageman JC, Morrison M, Sanza LT, Como-Sabetti K, Jernigan JA, Harriman K,  
836 Harrison LH, Lynfield R, Farley MM. 2005. Methicillin-resistant *Staphylococcus aureus*  
837 disease in three communities. N. Engl. J. Med. 352:1436–1444.
- 838 Garrison E, Marth G. 2012. Haplotype-based variant detection from short-read sequencing. ArXiv.
- 839 Girvan M, Newman MEJ. 2002. Community structure in social and biological networks. Proc. Natl.  
840 Acad. Sci. U. S. A. 99:7821–7826.
- 841 Goering R V., Shawar RM, Scangarella NE, O’Hara FP, Amrine-Madsen H, West JM, Dalessandro  
842 M, Becker J, Walsh SL, Miller L, et al. 2008. Molecular epidemiology of methicillin-resistant  
843 and methicillin-susceptible *Staphylococcus aureus* isolates from global clinical trials. J. Clin.  
844 Microbiol. 46:2842–2847.



- 845 Guindon S, Dufayard J, Lefort V, Anisimova M, Hordijk W, Gascuel O. 2010. New algorithms and  
846 methods to estimate maximum-likelihood phylogenies: assessing the performance of PhyML  
847 3.0. *Syst Biol* 59:307–321.
- 848 Guy L, Roat Kultima J, Andersson SGE. 2010. genoPlotR: comparative gene and genome  
849 visualization in R. *Bioinforma.* 26:2334–2335.
- 850 van Hal SJ, Steinig EJ, Andersson P, Holden MTG, Harris SR, Nimmo GR, Williamson DA,  
851 Heffernan H, Ritchie SR, Kearns AM, et al. 2018. Global Scale Dissemination of ST93: A  
852 Divergent *Staphylococcus aureus* Epidemic Lineage That Has Recently Emerged From  
853 Remote Northern Australia. *Front. Microbiol.* 9.
- 854 Harris SR, Feil EJ, Holden MTG, Quail MA, Nickerson EK, Chantratita N, Gardete S, Tavares A,  
855 Day N, Lindsay JA, et al. 2010. Evolution of MRSA during hospital transmission and  
856 intercontinental spread. *Science* 327:469–474.
- 857 Holden MTG, Hsu L-Y, Kurt K, Weinert LA, Mather AE, Harris SR, Strommenger B, Layer F,  
858 Witte W, de Lencastre H, et al. 2013. A genomic portrait of the emergence, evolution, and  
859 global spread of a methicillin-resistant *Staphylococcus aureus* pandemic. *Genome Res.*  
860 23:653–664.
- 861 Hunt M, Mather AE, Sánchez-Busó L, Page AJ, Parkhill J, Keane JA, Harris SR. 2017. ARIBA:  
862 rapid antimicrobial resistance genotyping directly from sequencing reads. *Microb. Genomics*  
863 3:e000131.
- 864 Jombart T, Balloux F, Dray S. 2010. adephylo: new tools for investigating the phylogenetic signal  
865 in biological traits. *Bioinformatics* 26:1907–1909.
- 866 Kennedy AD, Porcella SF, Martens C, Whitney AR, Braughton KR, Chen L, Craig CT, Tenover  
867 FC, Kreiswirth BN, Musser JM, et al. 2010. Complete nucleotide sequence analysis of  
868 plasmids in strains of *Staphylococcus aureus* clone USA300 reveals a high level of identity  
869 among isolates with closely related core genome sequences. *J. Clin. Microbiol.* 48:4504–4511.
- 870 Korber B, Muldoon M, Theiler J, Gao F, Gupta R, Lapedes A, Hahn BH, Wolinsky S, Bhattacharya  
871 T. 2000. Timing the ancestor of the HIV-1 pandemic strains. *Science* (80-. ). 288:1789–1796.
- 872 Köster J, Rahmann S. 2012. Snakemake—a scalable bioinformatics workflow engine.  
873 *Bioinformatics* 28:2520–2522.
- 874 Lee SM, Ender M, Adhikari R, Smith JMB, Berger-Bächi B, Cook GM. 2007. Fitness cost of  
875 staphylococcal cassette chromosome mec in methicillin-resistant *Staphylococcus aureus* by  
876 way of continuous culture. *Antimicrob. Agents Chemother.* 51:1497–1499.
- 877 Letunic I, Bork P. 2007. Interactive Tree Of Life (iTOL): an online tool for phylogenetic tree  
878 display and annotation. *Bioinformatics* 23:127–128.
- 879 Li H. 2013. Aligning sequence reads, clone sequences and assembly contigs with BWA-MEM.

- 880 ArXiv.
- 881 Li H, Handsaker B, Wysoker A, Fennell T, Ruan J, Homer N, Marth G, Abecasis G, Durbin R.  
882 2009. The Sequence Alignment/Map format and SAMtools. *Bioinformatics* 25:2078–2079.
- 883 Madzgalla S, Syed MA, Khan MA, Rehman SS, Müller E, Reissig A, Ehricht R, Monecke S. 2016.  
884 Molecular characterization of *Staphylococcus aureus* isolates causing skin and soft tissue  
885 infections in patients from Malakand, Pakistan. *Eur. J. Clin. Microbiol. Infect. Dis.* 35:1541–  
886 1547.
- 887 Magoč T, Salzberg SL. 2011. FLASH: fast length adjustment of short reads to improve genome  
888 assemblies. *Bioinformatics* 27:2957–2963.
- 889 Manoharan A, Zhang L, Poojary A, Bhandarkar L, Koppikar G, Robinson DA. 2012. An outbreak  
890 of post-partum breast abscesses in Mumbai, India caused by ST22-MRSA-IV: genetic  
891 characteristics and epidemiological implications. *Epidemiol. Infect.* 140:1809–1812.
- 892 Monecke S, Coombs G, Shore AC, Coleman DC, Akpaka P, Borg M, Chow H, Ip M, Jatzwauk L,  
893 Jonas D, et al. 2011. A field guide to pandemic, epidemic and sporadic clones of methicillin-  
894 resistant *Staphylococcus aureus*. *PLoS One* 6:e17936.
- 895 Monecke S, Jatzwauk L, Müller E, Nitschke H, Pfohl K, Slickers P, Reissig A, Ruppelt-Lorz A,  
896 Ehricht R. 2016. Diversity of SCCmec Elements in *Staphylococcus aureus* as Observed in  
897 South-Eastern Germany. *PLoS One* 11:e0162654.
- 898 Morrison MA, Hageman JC, Klevens RM. 2006. Case definition for community-associated  
899 methicillin-resistant *Staphylococcus aureus*. *J. Hosp. Infect.* 62:241.
- 900 Murray GGR, Wang F, Harrison EM, Paterson GK, Mather AE, Harris SR, Holmes MA, Rambaut  
901 A, Welch JJ. 2016. The effect of genetic structure on molecular dating and tests for temporal  
902 signal. *Methods Ecol. Evol.* 7:80–89.
- 903 Nadig S, Velusamy N, Lalitha P, Kar S, Sharma S, Arakere G. 2012. *Staphylococcus aureus* eye  
904 infections in two Indian hospitals: emergence of ST772 as a major clone. *Clin. Ophthalmol.*  
905 6:165–173.
- 906 Neuditschko M, Khatkar MS, Raadsma HW. 2012. NetView: a high-definition network-  
907 visualization approach to detect fine-scale population structures from genome-wide patterns of  
908 variation. Timpson NJ, editor. *PLoS One* 7:e48375.
- 909 Nimmo GR. 2012. USA300 abroad: global spread of a virulent strain of community-associated  
910 methicillin-resistant *Staphylococcus aureus*. *Clin. Microbiol. Infect.* 18:725–734.
- 911 Page AJ, Cummins CA, Hunt M, Wong VK, Reuter S, Holden MTG, Fookes M, Falush D, Keane  
912 JA, Parkhill J. 2015. Roary: rapid large-scale prokaryote pan genome analysis. *Bioinformatics*  
913 31:3691–3693.
- 914 Paradis E, Claude J, Strimmer K. 2004. APE: analyses of phylogenetics and evolution in R

- 915 language. *Bioinformatics* 20:289–290.
- 916 Paterson GK, Harrison EM, Murray GGR, Welch JJ, Warland JH, Holden MTG, Morgan FJE, Ba  
917 X, Koop G, Harris SR, et al. 2015. Capturing the cloud of diversity reveals complexity and  
918 heterogeneity of MRSA carriage, infection and transmission. *Nat. Commun.* 6:6560.
- 919 Planet PJ, Diaz L, Kolokotronis S-O, Narechania A, Reyes J, Xing G, Rincon S, Smith H, Panesso  
920 D, Ryan C, et al. 2015. Parallel epidemics of community-associated methicillin-resistant  
921 *Staphylococcus aureus* USA300 infection in North and South America. *J. Infect. Dis.*  
922 212:1874–1882.
- 923 Planet PJ, LaRussa SJ, Dana A, Smith H, Xu A, Ryan C, Uhlemann A-C, Boundy S, Goldberg J,  
924 Narechania A, et al. 2013. Emergence of the epidemic methicillin-resistant *Staphylococcus*  
925 *aureus* strain USA300 coincides with horizontal transfer of the arginine Catabolic Mobile  
926 Element and speG-mediated Adaptations for Survival on Skin. *MBio* 4.
- 927 Pokhrel RH, Aung MS, Thapa B, Chaudhary R, Mishra SK, Kawaguchiya M, Urushibara N,  
928 Kobayashi N. 2017. Detection of ST772 Panton-Valentine leukocidin-positive methicillin-  
929 resistant *Staphylococcus aureus* (Bengal Bay clone) and ST22 *S.aureus* isolates with a genetic  
930 variant of elastin binding protein in Nepal. *New Microbes New Infect.* 11:20–27.
- 931 Pons P, Latapy M. 2006. Computing communities in large networks using random walks. *J. Graph*  
932 *Algorithms Appl.* 10:191–218.
- 933 Prabhakara S, Khedkar S, Loganathan RM, Chandana S, Gowda M, Arakere G, Seshasayee ASN.  
934 2012. Draft genome sequence of *Staphylococcus aureus* 118 (ST772), a major disease clone  
935 from India. *J. Bacteriol.* 194:3727–3728.
- 936 Prabhakara S, Khedkar S, Shambat SM, Srinivasan R, Basu A, Norrby-Teglund A, Seshasayee  
937 ASN, Arakere G. 2013a. Genome sequencing unveils a novel sea enterotoxin-carrying PVL  
938 phage in *Staphylococcus aureus* ST772 from India. *PLoS One* 8:e60013.
- 939 Prabhakara S, Khedkar S, Shambat SM, Srinivasan R, Basu A, Norrby-Teglund A, Seshasayee  
940 ASN, Arakere G. 2013b. Genome sequencing unveils a novel sea enterotoxin-carrying PVL  
941 phage in *Staphylococcus aureus* ST772 from India. Otto M, editor. *PLoS One* 8:e60013.
- 942 Rambaut A, Lam TT, Max Carvalho L, Pybus OG. 2016. Exploring the temporal structure of  
943 heterochronous sequences using TempEst (formerly Path-O-Gen). *Virus Evol.* 2:vew007.
- 944 Ramsden C, Holmes EC, Charleston MA. 2009. Hantavirus evolution in relation to its rodent and  
945 insectivore hosts: no evidence for codivergence. *Mol. Biol. Evol.* 26:143–153.
- 946 Revell LJ. 2012. phytools: an R package for phylogenetic comparative biology (and other things).  
947 *Methods Ecol. Evol.* 3:217–223.
- 948 Rosvall M, Bergstrom CT. 2008. Maps of random walks on complex networks reveal community  
949 structure. *Proc. Natl. Acad. Sci. U. S. A.* 105:1118–1123.

- 950 Schijffelen MJ, Boel CHE, van Strijp JAG, Fluit AC. 2010. Whole genome analysis of a livestock-  
951 associated methicillin-resistant *Staphylococcus aureus* ST398 isolate from a case of human  
952 endocarditis. BMC Genomics 11:376.
- 953 Seemann T. 2014. Prokka: rapid prokaryotic genome annotation. Bioinformatics 30:2068–2069.
- 954 Shore AC, Tecklenborg SC, Brennan GI, Ehricht R, Monecke S, Coleman DC. 2014. Panton-  
955 Valentine leukocidin-positive *Staphylococcus aureus* in Ireland from 2002 to 2011: 21 clones,  
956 frequent importation of clones, temporal shifts of predominant methicillin-resistant *S. aureus*  
957 clones, and increasing multiresistance. J. Clin. Microbiol. 52:859–870.
- 958 Song L, Florea L, Langmead B. 2014. Lighter: fast and memory-efficient sequencing error  
959 correction without counting. Genome Biol. 15:509.
- 960 Stamatakis A. 2014. RAxML Version 8: a tool for phylogenetic analysis and post-analysis of large  
961 phylogenies. Bioinformatics 30:1312–1313.
- 962 Stegger M, Price LB, Larsen AR, Gillece JD, Waters AE, Skov R, Andersen PS. 2012. Genome  
963 sequence of *Staphylococcus aureus* strain 11819-97, an ST80-IV European community-  
964 acquired methicillin-resistant isolate. J. Bacteriol. 194:1625–1626.
- 965 Stegger M, Wirth T, Andersen PS, Skov RL, De Grassi A, Simões PM, Tristan A, Petersen A, Aziz  
966 M, Kiil K, et al. 2014. Origin and evolution of European community-acquired methicillin-  
967 resistant *Staphylococcus aureus*. MBio 5:e01044-14.
- 968 Steinig EJ, Andersson P, Harris SR, Sarovich DS, Manoharan A, Coupland P, Holden MT, Parkhill  
969 J, Bentley SD, Robinson DA, et al. 2015. Single-molecule sequencing reveals the molecular  
970 basis of multidrug-resistance in ST772 methicillin-resistant *Staphylococcus aureus*. BMC  
971 Genomics 16:388.
- 972 Steinig EJ, Neuditschko M, Khatkar MS, Raadsma HW, Zenger KR. 2016. NetView P : a network  
973 visualization tool to unravel complex population structure using genome-wide SNPs. Mol.  
974 Ecol. Resour. 16:216–227.
- 975 Strauß L, Stegger M, Akpaka PE, Alabi A, Breurec S, Coombs G, Egyir B, Larsen AR, Laurent F,  
976 Monecke S, et al. 2017. Origin, evolution, and global transmission of community-acquired  
977 *Staphylococcus aureus* ST8. Proc. Natl. Acad. Sci. 114:E10596 LP-E10604.
- 978 Stucki D, Brites D, Jeljeli L, Coscolla M, Liu Q, Trauner A, Fenner L, Rutaihwa L, Borrell S, Luo  
979 T, et al. 2016. *Mycobacterium tuberculosis* lineage 4 comprises globally distributed and  
980 geographically restricted sublineages. Nat Genet 48:1535–1543.
- 981 Suaya JA, Mera RM, Cassidy A, O’Hara P, Amrine-Madsen H, Burstin S, Miller LG. 2014.  
982 Incidence and cost of hospitalizations associated with *Staphylococcus aureus* skin and soft  
983 tissue infections in the United States from 2001 through 2009. BMC Infect. Dis. 14:296.
- 984 To T-H, Jung M, Lycett S, Gascuel O. 2016. Fast dating using least-squares criteria and algorithms.

- 985 Syst. Biol. 65:82–97.
- 986 Tong SYC, Davis JS, Eichenberger E, Holland TL, Fowler VGJ. 2015. *Staphylococcus aureus*  
987 infections: epidemiology, pathophysiology, clinical manifestations, and management. Clin.  
988 Microbiol. Rev. 28:603–661.
- 989 Tong SYC, Kearns AM. 2013. Community-associated MRSA from the Indian subcontinent. Lancet  
990 Infect. Dis. 13:734–735.
- 991 Truong-Bolduc QC, Villet RA, Estabrooks ZA, Hooper DC. 2014. Native efflux pumps contribute  
992 resistance to antimicrobials of skin and the ability of *Staphylococcus aureus* to colonize skin. J.  
993 Infect. Dis. 209:1485–1493.
- 994 Walker BJ, Abeel T, Shea T, Priest M, Abouelliel A, Sakthikumar S, Cuomo CA, Zeng Q,  
995 Wortman J, Young SK, et al. 2014. Pilon: An Integrated Tool for Comprehensive Microbial  
996 Variant Detection and Genome Assembly Improvement. PLoS One 9:e112963.
- 997 Ward MJ, Goncheva M, Richardson E, McAdam PR, Raftis E, Kearns A, Daum RS, David MZ,  
998 Lauderdale TL, Edwards GF, et al. 2016. Identification of source and sink populations for the  
999 emergence and global spread of the East-Asia clone of community-associated MRSA. Genome  
1000 Biol. 17:160.
- 1001 White MJ, Boyd JM, Horswill AR, Nauseef WM. 2014. Phosphatidylinositol-specific  
1002 phospholipase C contributes to survival of *Staphylococcus aureus* USA300 in human blood  
1003 and neutrophils. Infect. Immun. 82:1559–1571.
- 1004 Wood DE, Salzberg SL. 2014. Kraken: ultrafast metagenomic sequence classification using exact  
1005 alignments. Genome Biol. 15:1–12.
- 1006 Yu G, Smith DK, Zhu H, Guan Y, Lam TT-Y. 2017. ggtree: an r package for visualization and  
1007 annotation of phylogenetic trees with their covariates and other associated data. Methods Ecol.  
1008 Evol. 8:28–36.
- 1009 Zanger P, Nurjadi D, Schleucher R, Scherbaum H, Wolz C, Kremsner PG, Schulte B. 2012. Import  
1010 and spread of Panton-Valentine Leukocidin-positive *Staphylococcus aureus* through nasal  
1011 carriage and skin infections in travelers returning from the tropics and subtropics. Clin. Infect.  
1012 Dis. 54:483–492.
- 1013 Ziebuhr W, Heilmann C, Götz F, Meyer P, Wilms K, Straube E, Hacker J. 1997. Detection of the  
1014 intercellular adhesion gene cluster (*ica*) and phase variation in *Staphylococcus epidermidis*  
1015 blood culture strains and mucosal isolates. Infect. Immun. 65:890–896.

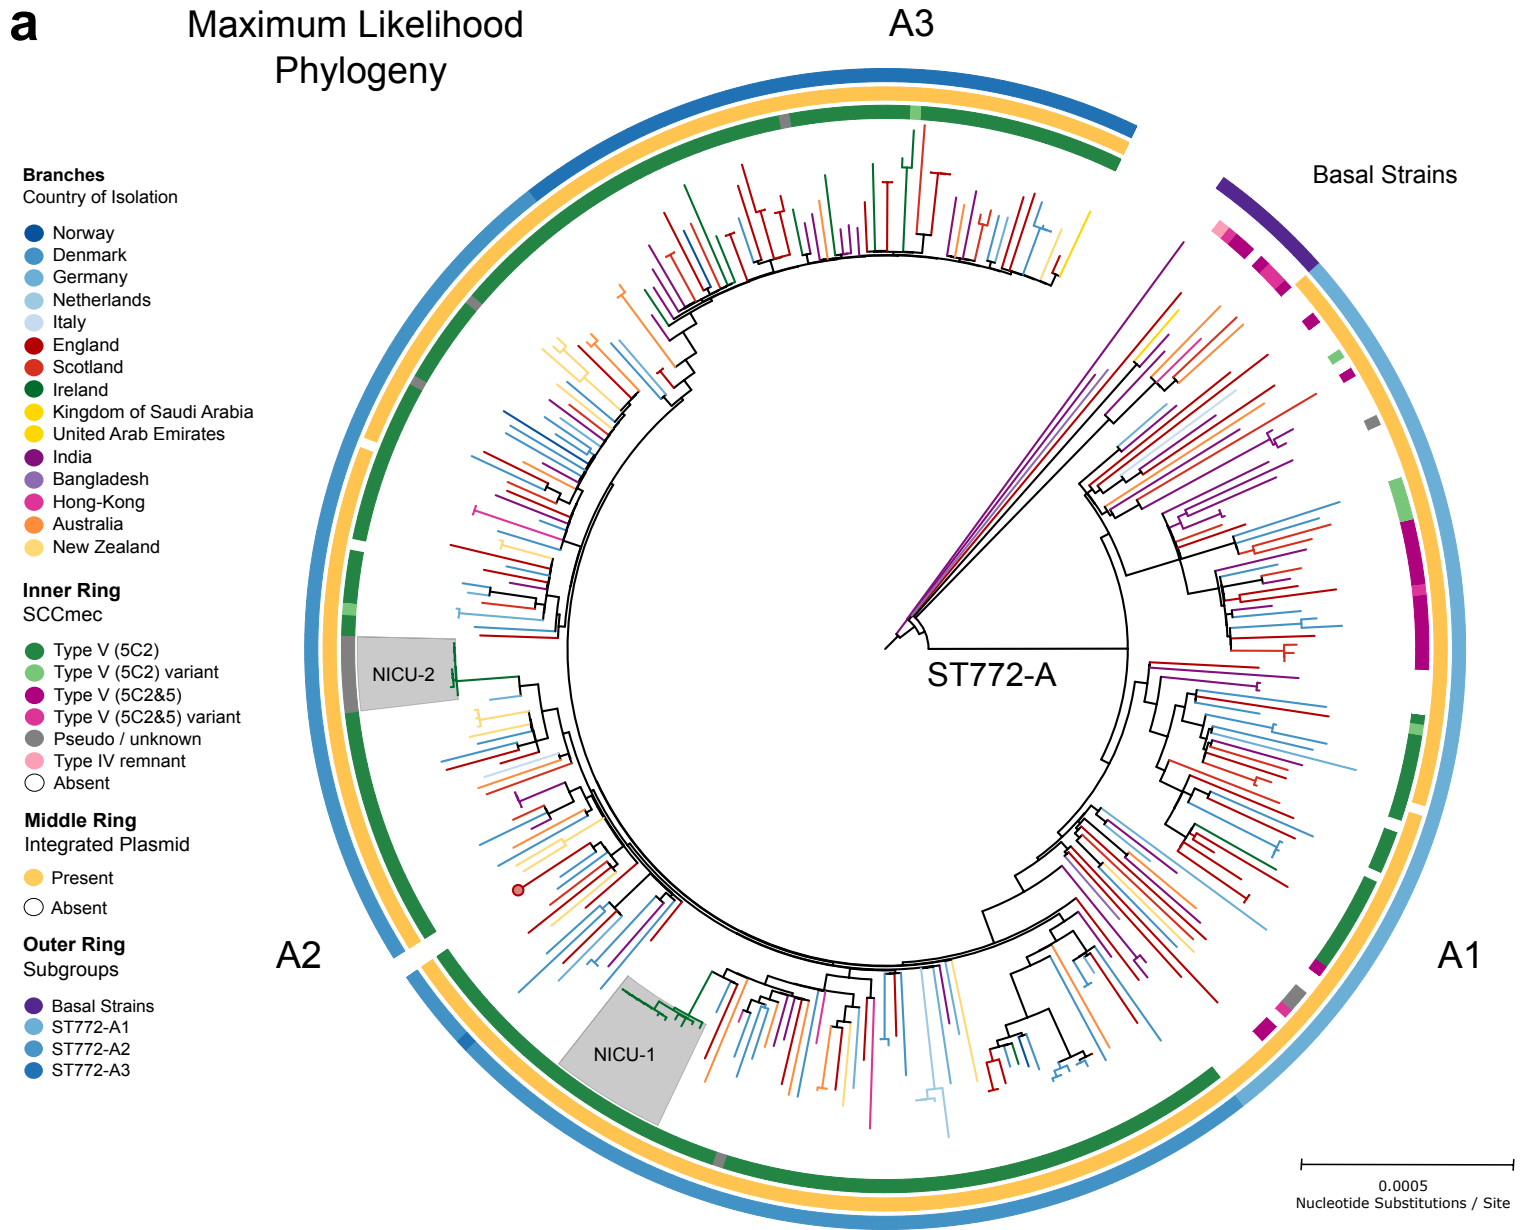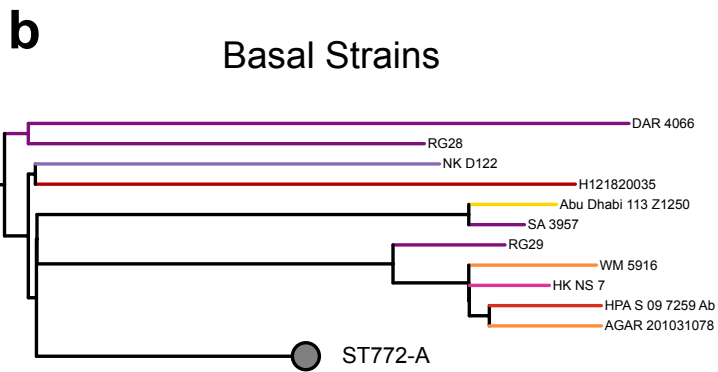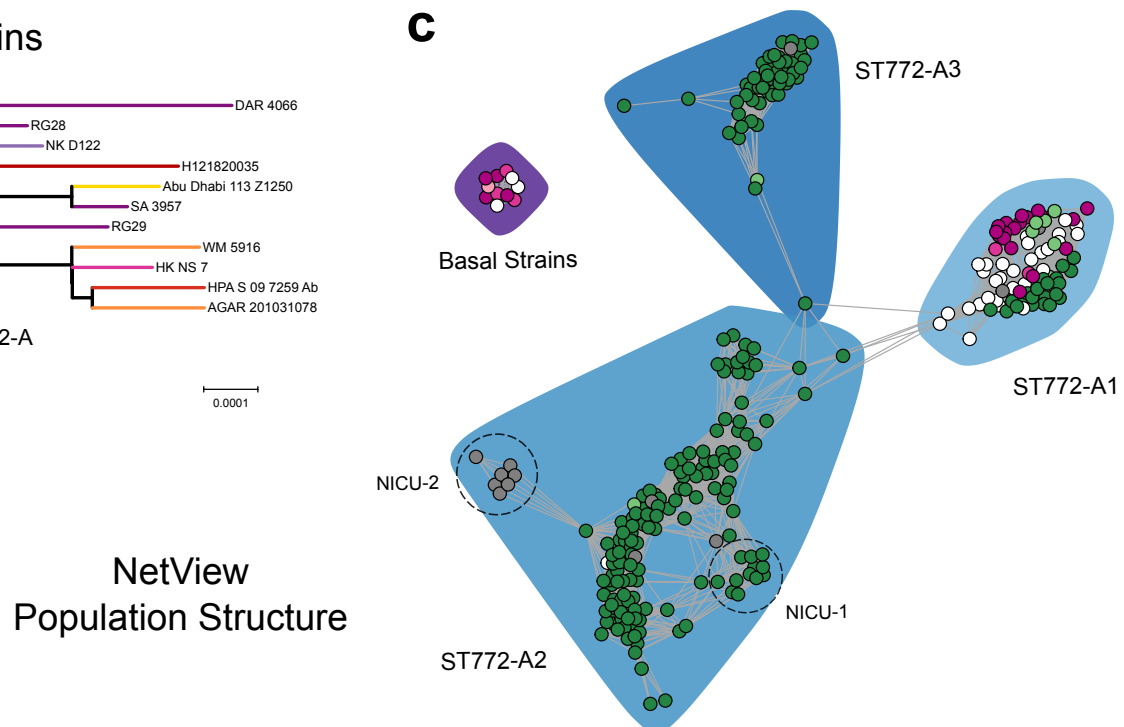

**a**

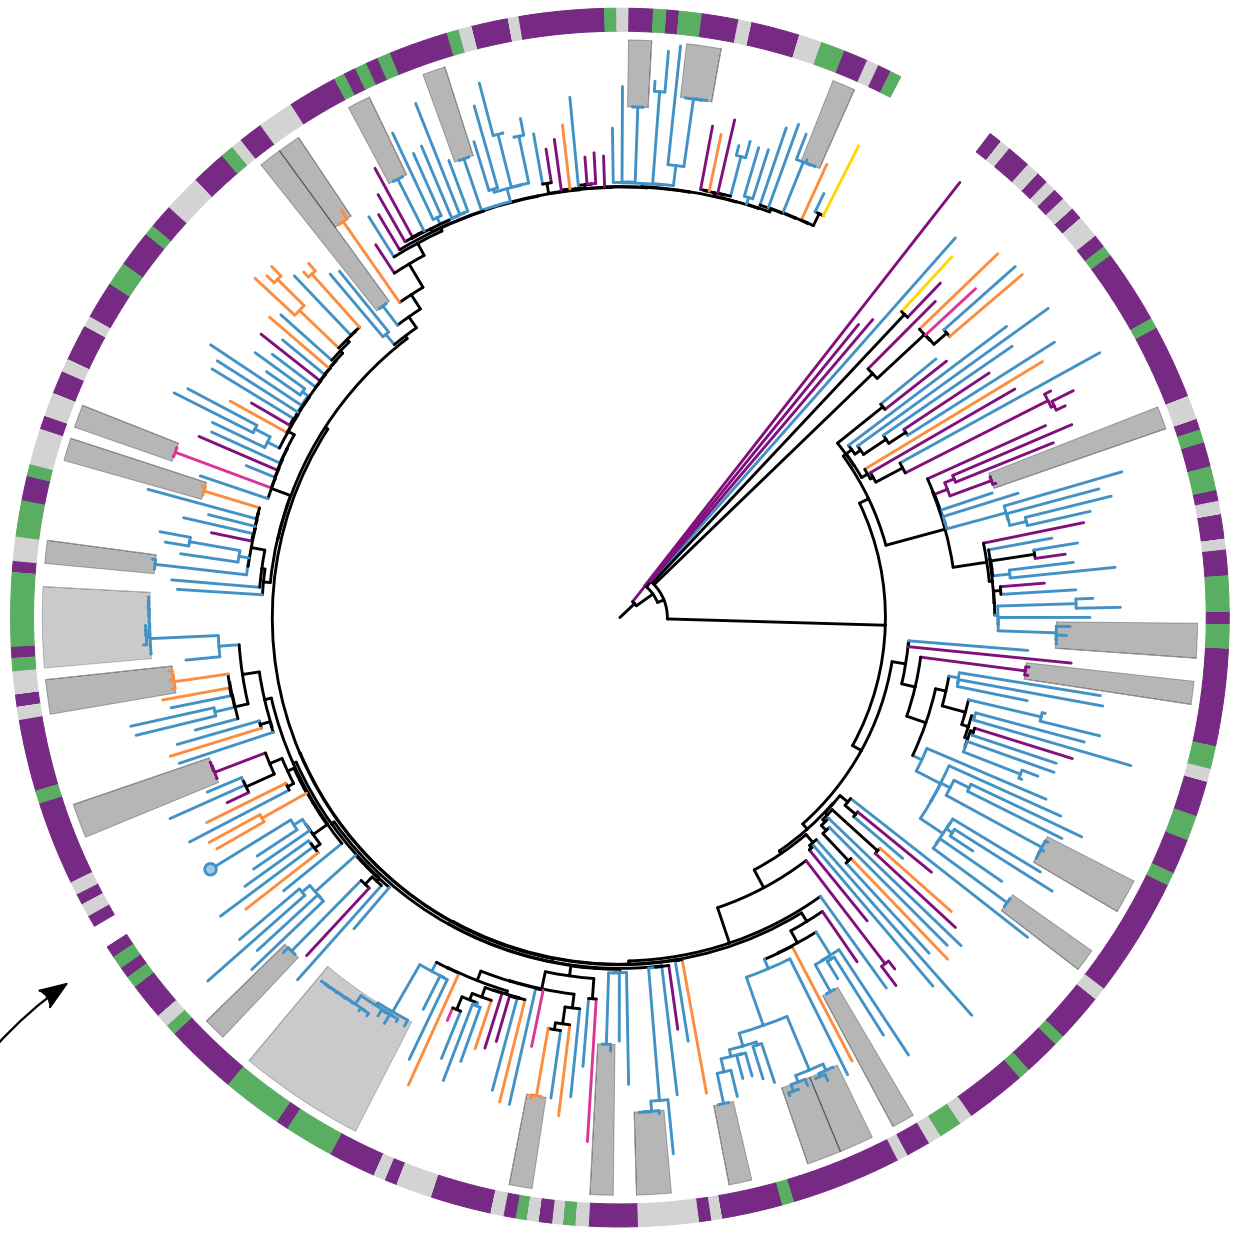

**Ring**

Travel or family in:

- South Asia (60%)
- Other (21%)
- Unknown (19%)

**Highlights**

■ Transmission  
≤ 4 SNPs

**Branches**

Region of Isolation

- Arabian Peninsula
- Asia
- Australasia
- Europe
- South Asia

**b**

**Regional Diversity**

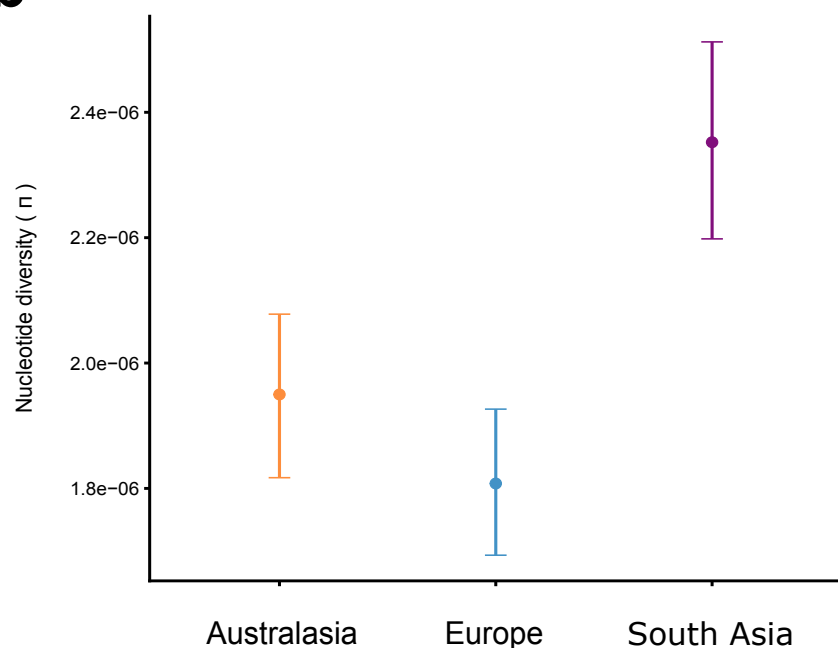

**a**

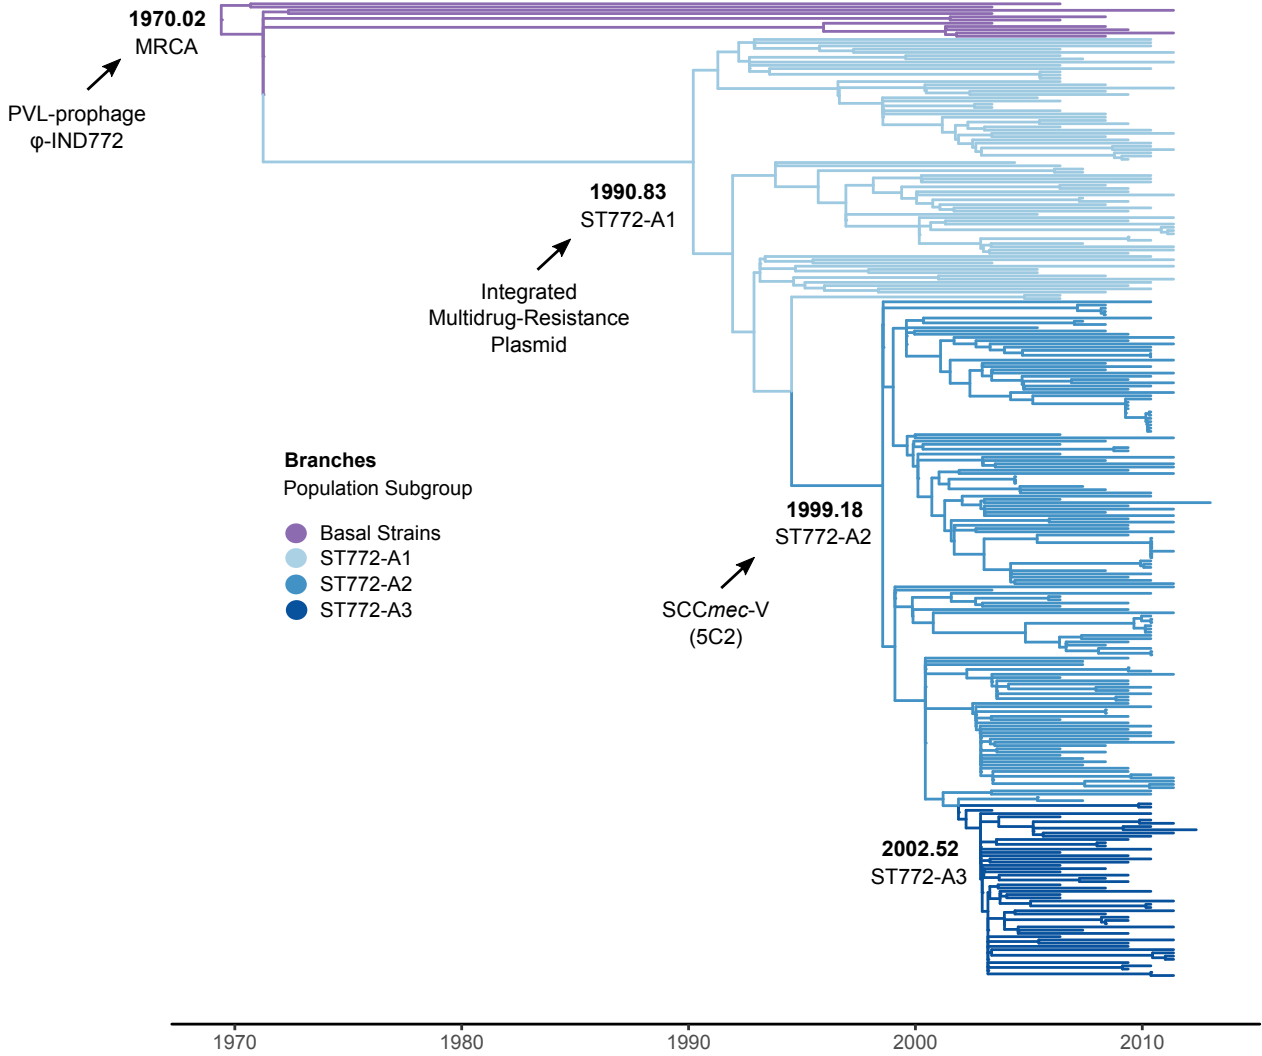

**b**

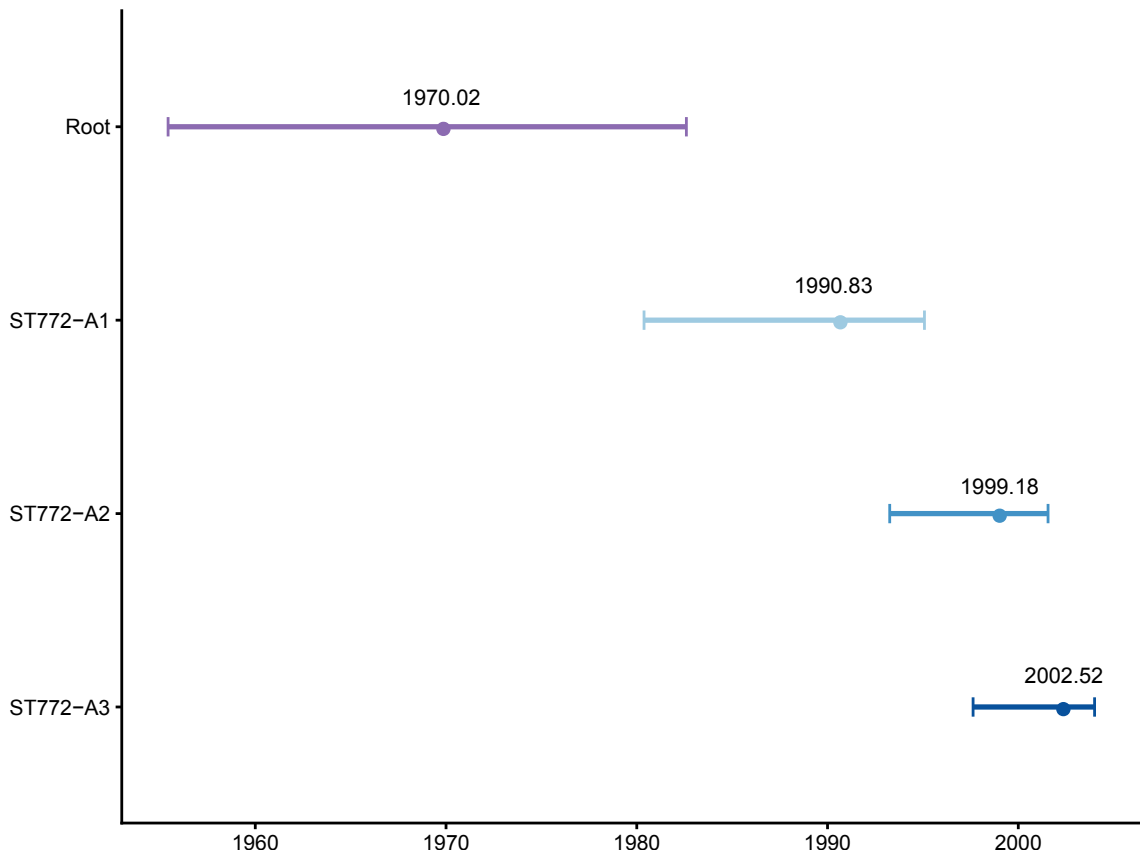



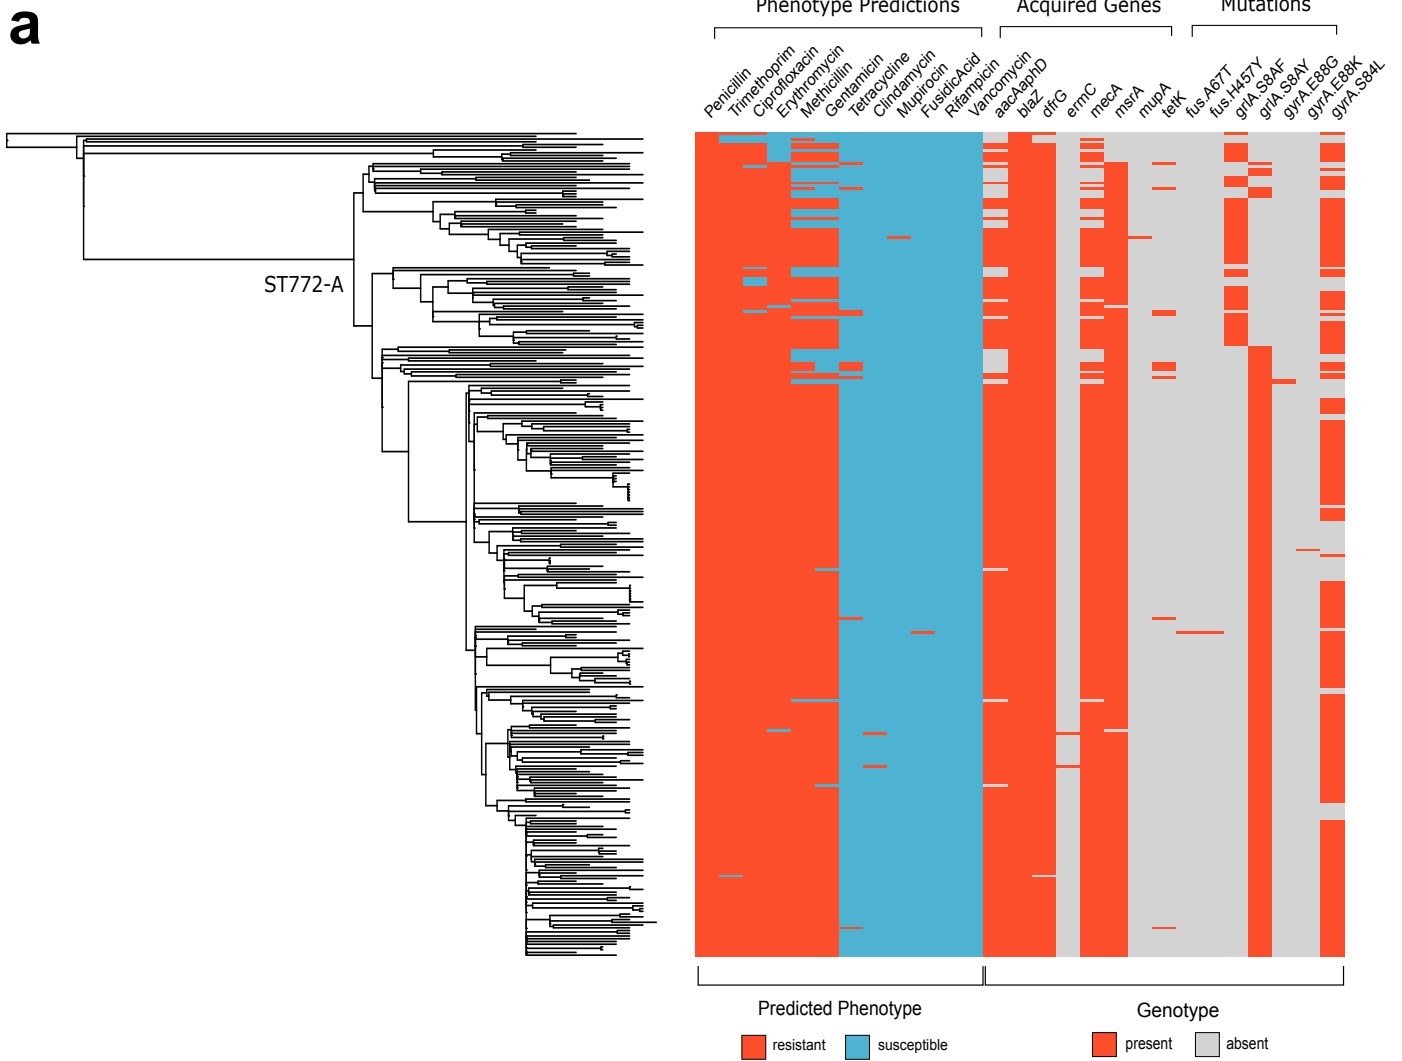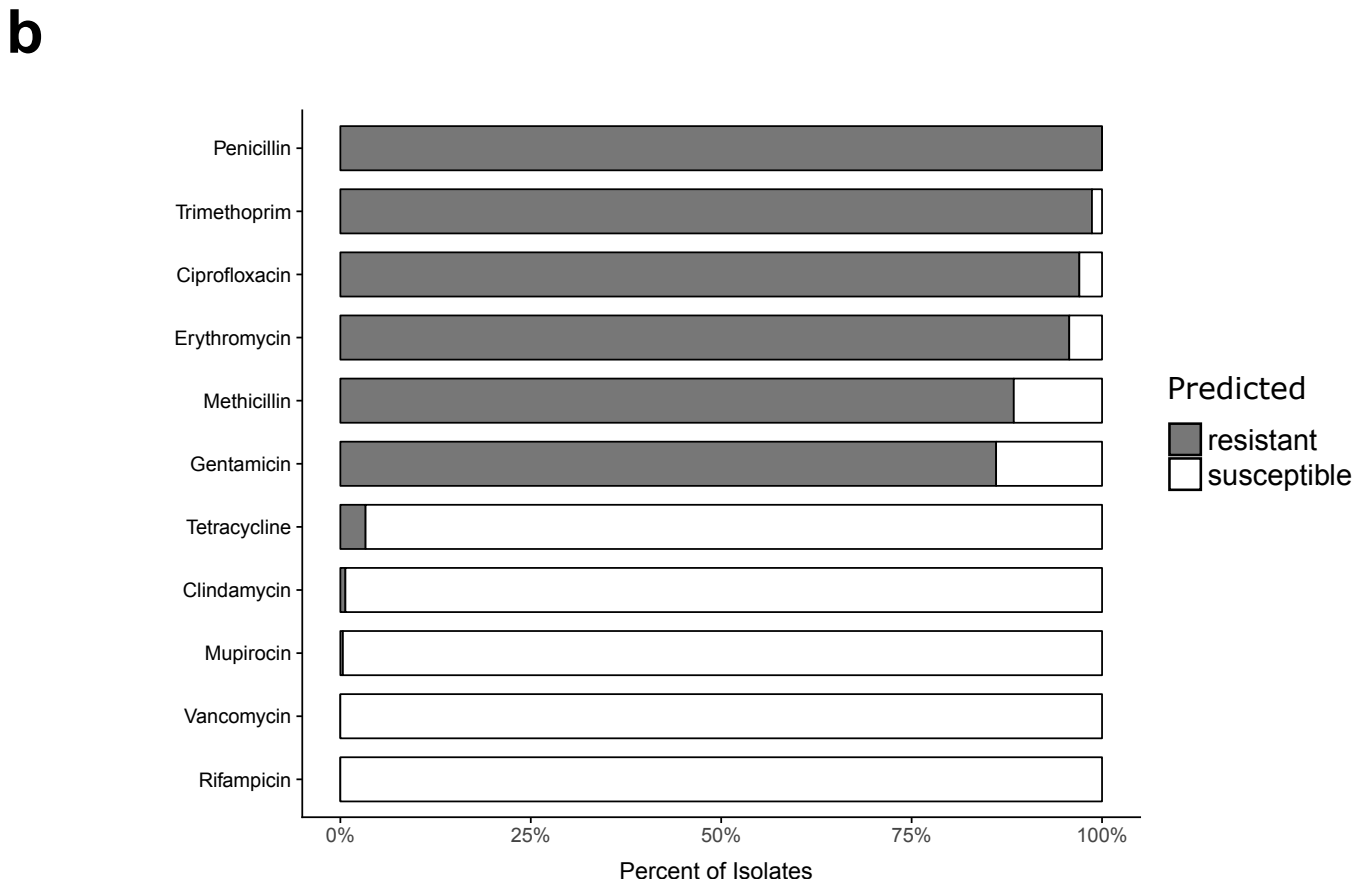

**a**

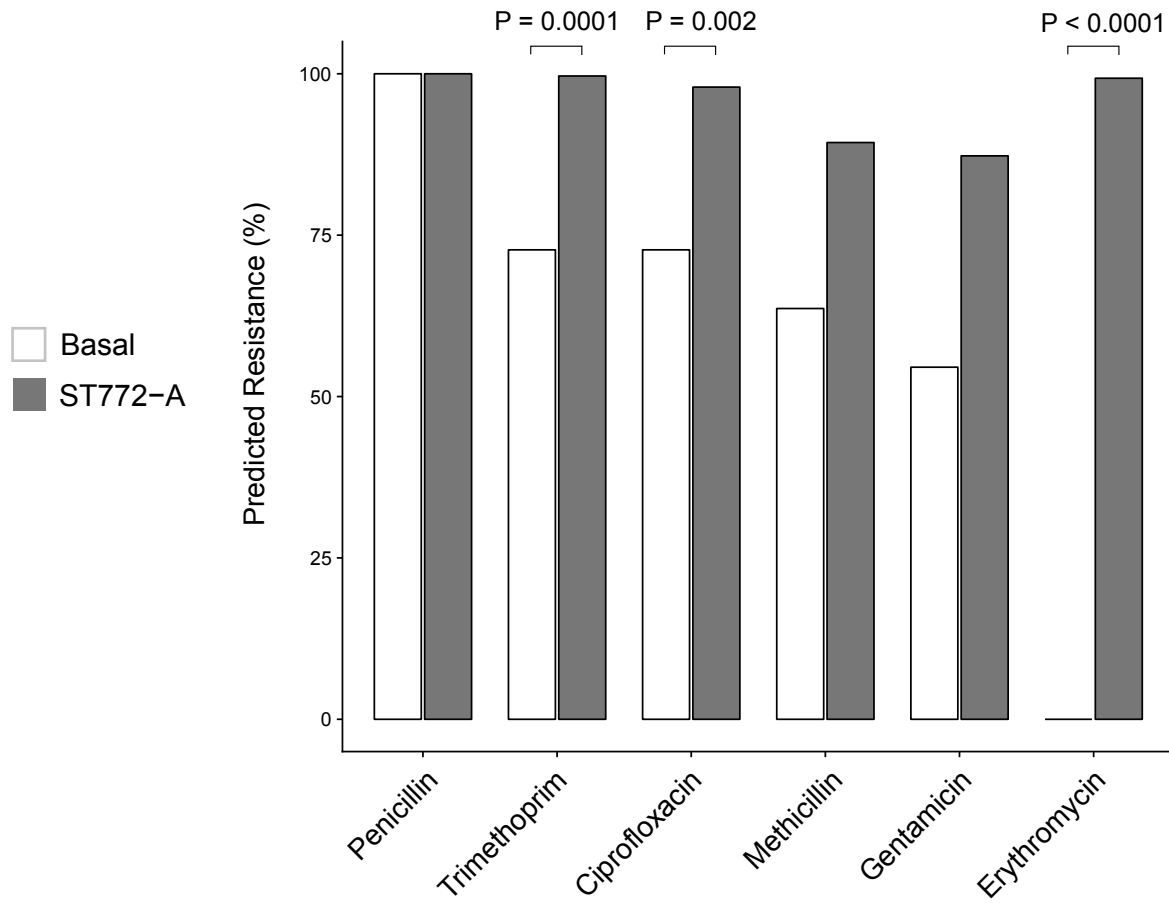

**b**

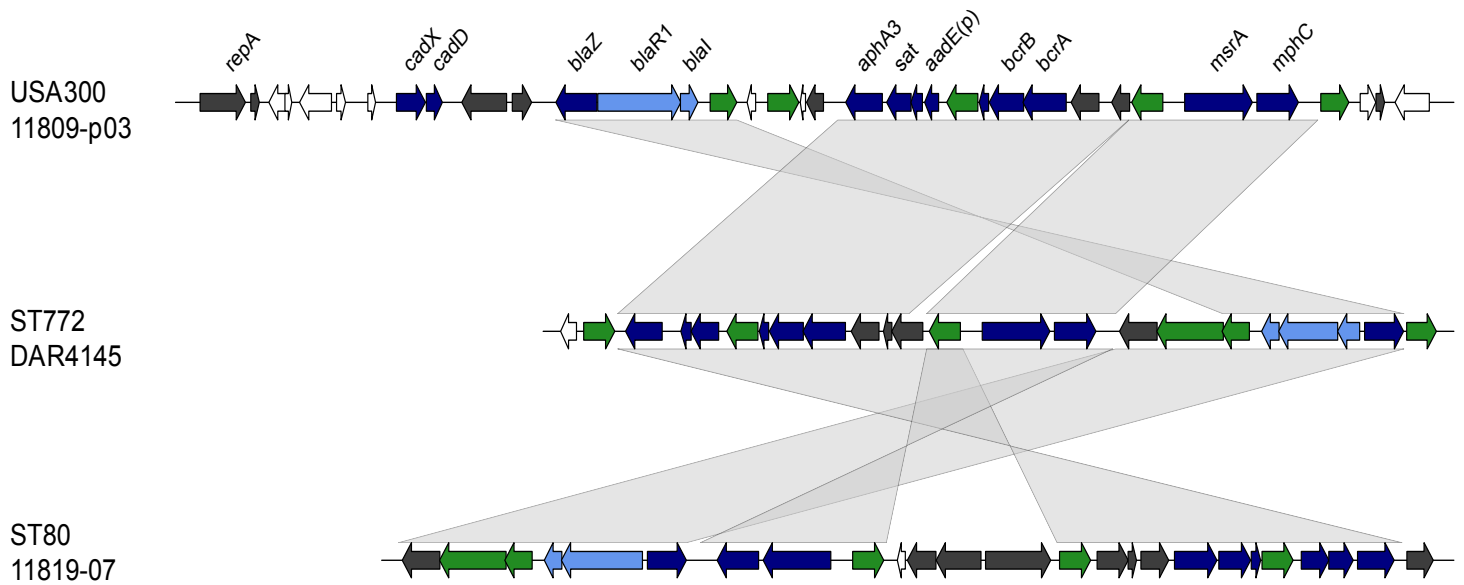

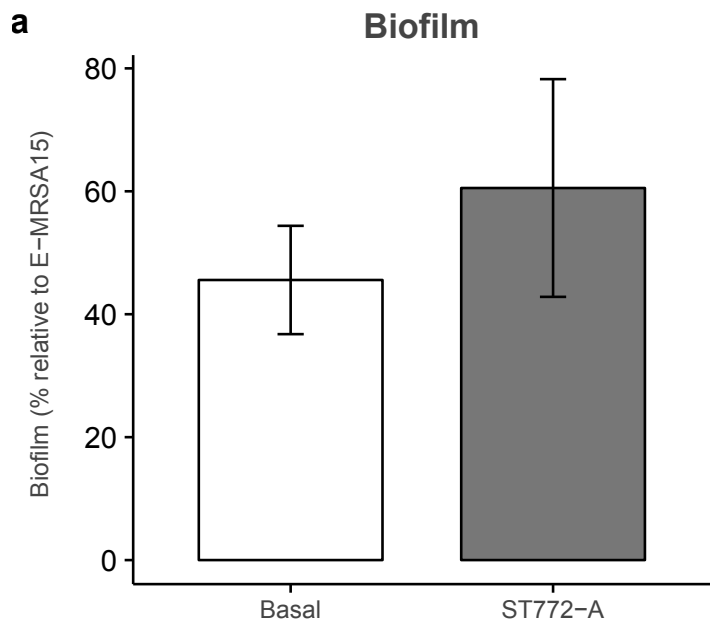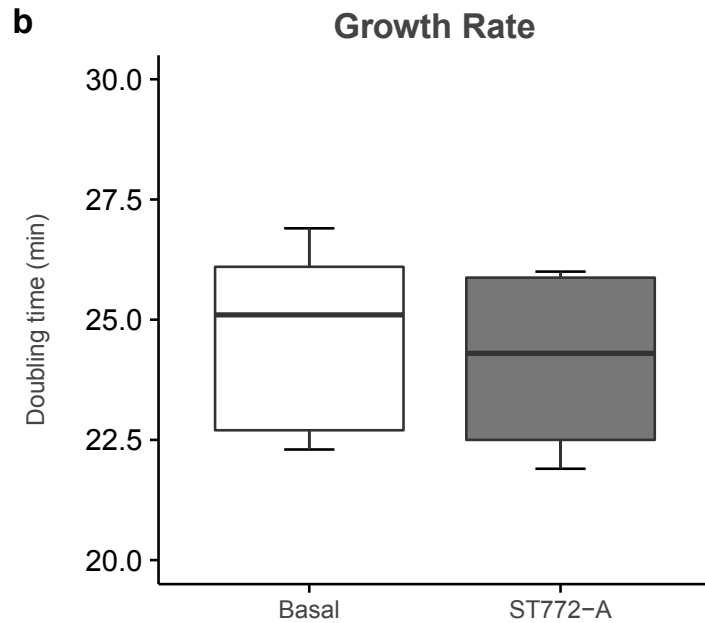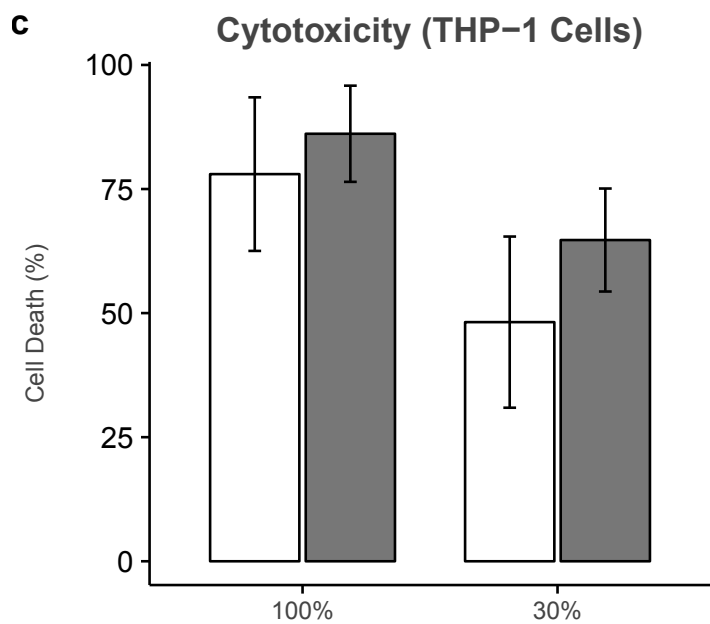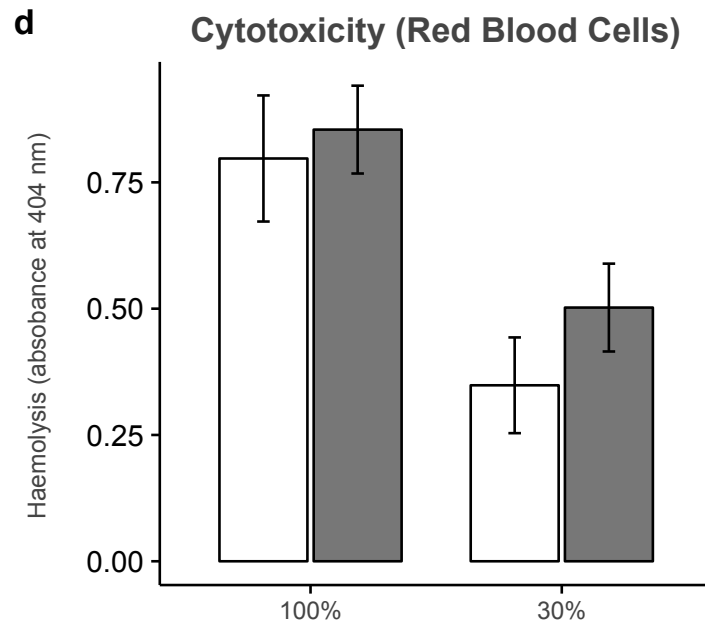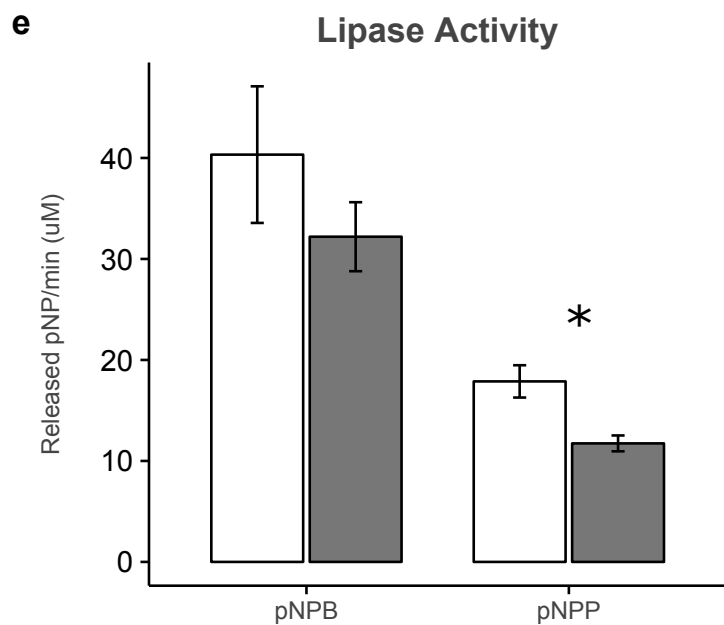

Source: https://www.biorxiv.org/content/10.1101/233395v3.full.pdf
